# Supplementary material for: Efficacy and safety of oral hydroxyurea in transfusion-dependent β-thalassaemia: a protocol for randomised double-blind controlled clinical trial
Source: PubMed Central journal article supplement — BMJ Open. 2020 Oct 27;10(10):e041958. doi: 10.1136/bmjopen-2020-041958 (PMC7592299; doi:10.1136/bmjopen-2020-041958), 2020-10-27
Supplement: bmjopen-2020-041958.draft_revisions.pdf [file bmjopen-2020-041958.draft_revisions.pdf]

# BMJ Open

BMJ Open is committed to open peer review. As part of this commitment we make the peer review history of every article we publish publicly available.

When an article is published we post the peer reviewers' comments and the authors' responses online. We also post the versions of the paper that were used during peer review. These are the versions that the peer review comments apply to.

The versions of the paper that follow are the versions that were submitted during the peer review process. They are not the versions of record or the final published versions. They should not be cited or distributed as the published version of this manuscript.

BMJ Open is an open access journal and the full, final, typeset and author-corrected version of record of the manuscript is available on our site with no access controls, subscription charges or pay-per-view fees (<http://bmjopen.bmj.com>).

If you have any questions on BMJ Open's open peer review process please email [info.bmjopen@bmj.com](mailto:info.bmjopen@bmj.com)

# BMJ Open

## Efficacy and safety of oral hydroxyurea in transfusion dependent $\beta$ -thalassaemia: a protocol for randomised double-blind controlled clinical trial

|                               |                                                                                                                                                                                                                                                                                                                                                                                                                                                                                                                       |
|-------------------------------|-----------------------------------------------------------------------------------------------------------------------------------------------------------------------------------------------------------------------------------------------------------------------------------------------------------------------------------------------------------------------------------------------------------------------------------------------------------------------------------------------------------------------|
| Journal:                      | <i>BMJ Open</i>                                                                                                                                                                                                                                                                                                                                                                                                                                                                                                       |
| Manuscript ID                 | bmjopen-2020-041958                                                                                                                                                                                                                                                                                                                                                                                                                                                                                                   |
| Article Type:                 | Protocol                                                                                                                                                                                                                                                                                                                                                                                                                                                                                                              |
| Date Submitted by the Author: | 21-Jun-2020                                                                                                                                                                                                                                                                                                                                                                                                                                                                                                           |
| Complete List of Authors:     | Yasara, Nirmani; University of Kelaniya, Department of Paediatrics<br>Wickramarathne, Nethmi; University of Kelaniya, Department of Paediatrics<br>Mettananda, Chamila; University of Kelaniya, Department of Pharmacology<br>Manamperi, Aresha ; University of Kelaniya, Molecular Medicine Unit<br>Premawardhena, Anuja; University of Kelaniya, Department of Medicine; Colombo North Teaching Hospital<br>Mettananda, Sachith; University of Kelaniya, Department of Paediatrics; Colombo North Teaching Hospital |
| Keywords:                     | Haematopathology < PATHOLOGY, Anaemia < HAEMATOLOGY, Clinical trials < THERAPEUTICS, Genetics < TROPICAL MEDICINE                                                                                                                                                                                                                                                                                                                                                                                                     |
|                               |                                                                                                                                                                                                                                                                                                                                                                                                                                                                                                                       |

SCHOLARONE™  
Manuscripts

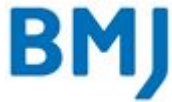

I, the Submitting Author has the right to grant and does grant on behalf of all authors of the Work (as defined in the below author licence), an exclusive licence and/or a non-exclusive licence for contributions from authors who are: i) UK Crown employees; ii) where BMJ has agreed a CC-BY licence shall apply, and/or iii) in accordance with the terms applicable for US Federal Government officers or employees acting as part of their official duties; on a worldwide, perpetual, irrevocable, royalty-free basis to BMJ Publishing Group Ltd ("BMJ") its licensees and where the relevant Journal is co-owned by BMJ to the co-owners of the Journal, to publish the Work in this journal and any other BMJ products and to exploit all rights, as set out in our [licence](#).

The Submitting Author accepts and understands that any supply made under these terms is made by BMJ to the Submitting Author unless you are acting as an employee on behalf of your employer or a postgraduate student of an affiliated institution which is paying any applicable article publishing charge ("APC") for Open Access articles. Where the Submitting Author wishes to make the Work available on an Open Access basis (and intends to pay the relevant APC), the terms of reuse of such Open Access shall be governed by a Creative Commons licence – details of these licences and which [Creative Commons](#) licence will apply to this Work are set out in our licence referred to above.

Other than as permitted in any relevant BMJ Author's Self Archiving Policies, I confirm this Work has not been accepted for publication elsewhere, is not being considered for publication elsewhere and does not duplicate material already published. I confirm all authors consent to publication of this Work and authorise the granting of this licence.

1  
2  
3 **Title:** Efficacy and safety of oral hydroxyurea in transfusion dependent  $\beta$ -  
4  
5  
6 thalassaemia: a protocol for randomised double-blind controlled clinical trial  
7  
8  
9

10 **Authors:** Nirmani Yasara<sup>1</sup>, Nethmi Wickramarathne<sup>1</sup>, Chamila Mettananda<sup>2</sup>, Aresha  
11  
12 Manamperi<sup>3</sup>, Anuja Premawardhena<sup>4,5</sup>, Sachith Mettananda<sup>1,5</sup>  
13  
14

15 **Author affiliations:**

16  
17 <sup>1</sup> Department of Paediatrics, Faculty of Medicine, University of Kelaniya, Sri Lanka

18  
19 <sup>2</sup> Department of Pharmacology, Faculty of Medicine, University of Kelaniya, Sri Lanka

20  
21 <sup>3</sup> Molecular Medicine Unit, Faculty of Medicine, University of Kelaniya, Sri Lanka

22  
23 <sup>4</sup> Department of Medicine, Faculty of Medicine, University of Kelaniya, Sri Lanka

24  
25 <sup>5</sup> Colombo North Teaching Hospital, Ragama, Sri Lanka  
26  
27  
28  
29  
30

31 **Corresponding author:**

32  
33 Name: Dr Sachith Mettananda

34  
35 Address: Department of Paediatrics, Faculty of Medicine – University of  
36  
37 Kelaniya, Thalagolla Road, Ragama 11010, Sri Lanka.

38  
39 Telephone: +94112961117 Fax: +94112958337

40  
41 Email: sachith.mettananda@kln.ac.lk  
42  
43  
44  
45  
46

47 **Word count:** 2482  
48  
49  
50

51 **Keywords:** Haemoglobinopathy; Anaemia; Clinical trials; Genetics  
52  
53  
54  
55  
56  
57  
58  
59  
60

## ABSTRACT

**Introduction:** Despite being one of the first diseases to be genetically characterised,  $\beta$ -thalassaemia remains a disorder without a cure in a majority. Most patients receive only supportive treatment therefore, have a poor quality of life and shorter life spans. Hydroxyurea is a drug that has shown to induce fetal haemoglobin synthesis and is recommended for the treatment of sickle cell disease. However, its usefulness in transfusion dependent  $\beta$ -thalassaemia is unclear. Here, we present a protocol for a randomized double-blind controlled clinical trial to evaluate the efficacy and safety of oral hydroxyurea in transfusion dependent  $\beta$ -thalassaemia.

**Methods and analysis:** This is a single-centre randomized double-blind placebo controlled clinical trial conducted at the Thalassaemia Centre of Colombo North Teaching Hospital, Ragama, Sri Lanka. Adult and adolescent patients with haematologically and genetically confirmed transfusion dependent  $\beta$ -thalassaemia are enrolled and randomised into the intervention or control group. The intervention group receives oral hydroxyurea 10-20mg/kg daily for six months while the control group receives a placebo which is identical in size, shape and colour to hydroxyurea without its active ingredient. Transfused blood volume, pre-transfusion haemoglobin, fetal haemoglobin level and adverse effects of treatment are monitored during treatment and for six months post-treatment. Cessation or reduction of blood transfusions during the treatment period will be the primary outcome measure. The statistical analysis will be based on intention to treat.

1  
2  
3 **Ethics and dissemination:** Ethical approval has been obtained from the Ethics  
4  
5 Committee of Faculty of Medicine, University of Kelaniya (P/116/05/2018) and the trial  
6  
7 is approved by the National Medicinal Regulatory Authority of Sri Lanka. Results of  
8  
9 the trial will be disseminated in scientific publications in reputed journals.  
10  
11  
12  
13

14 **Registration details:** The trial is registered in the Sri Lanka Clinical Trials Registry  
15  
16 (SLCTR/2018/024).  
17  
18  
19  
20  
21  
22  
23  
24  
25  
26  
27  
28  
29  
30  
31  
32  
33  
34  
35  
36  
37  
38  
39  
40  
41  
42  
43  
44  
45  
46  
47  
48  
49  
50  
51  
52  
53  
54  
55  
56  
57  
58  
59  
60

## STRENGTHS AND LIMITATIONS OF THIS STUDY

- A randomised double-blind placebo controlled clinical trial to evaluate the efficacy and safety of hydroxyurea in patients with transfusion dependent  $\beta$ -thalassaemia.
- Participants are genetically characterised for  $\beta$ -globin genotype,  $\alpha$ -globin genotype, *XmnI* polymorphism and *BCL11A* polymorphism to identify predictors of response to hydroxyurea.
- The effects of hydroxyurea on multiple outcomes are evaluated; i.e. transfusion requirement, baseline haemoglobin, fetal haemoglobin level and ineffective erythropoiesis.
- Participants continue to receive transfusions according to standard protocols therefore, this study will not be able to determine the ability of hydroxyurea to maintain a safe but lower steady state haemoglobin level.

## INTRODUCTION

$\beta$ -Thalassaemia is one of the most common genetic diseases in the world(1). It is estimated that 70,000 children are born annually with  $\beta$ -thalassaemia worldwide(2). The most severely affected patients develop profound anaemia during infancy which is life-threatening without blood transfusions(3). The only existing cure is allogeneic haematopoietic stem cell transplantation that is available only to a small subset of patients with matched related donors(4). All other patients, an overwhelming majority, are managed conservatively with supportive treatment using regular blood transfusions and iron chelation for life(5, 6). Due to complications of the disease, these patients experience a poor quality of life and die prematurely in their fourth or fifth decade(7, 8).

The pathophysiology of  $\beta$ -thalassaemia centres around the unbalanced synthesis of  $\alpha$ - and  $\beta$ -like globin chains in erythroid cells(9).  $\alpha$ -Globin pairs with  $\beta$ -globin to form haemoglobin (Hb) A during postnatal life and  $\gamma$ -globin to form HbF during fetal life in healthy humans. In  $\beta$ -thalassaemia, the synthesis of normal  $\beta$ -globin is markedly reduced due to autosomal recessively inherited mutations of the  $\beta$ -globin gene(10). The resultant unbalanced synthesis and accumulation of  $\alpha$ -globin chains lead to ineffective erythropoiesis and haemolysis causing severe anaemia(11). Several genetic modifiers which include augmentation of the synthesis of HbF by natural mutations that re-activate  $\gamma$ -globin are known to decrease  $\alpha$ -globin excess and ameliorate the severity of  $\beta$ -thalassaemia(12).

Hydroxyurea is a cytostatic agent that interrupts DNA synthesis by inhibiting the ribonucleotide reductase pathway(13). It is a well-tolerated FDA approved oral



1  
2  
3 medication that is widely used in the treatment of cancers. However, it has been  
4 reported as a potent inducer of  $\gamma$ -globin in human erythroid cells in several pre-clinical  
5 studies(14, 15). It has also shown to be effective as a HbF inducing agent in patients  
6 with sickle cell disease and non-transfusion dependent  $\beta$ -thalassaemia(16-18).  
7  
8 However, the benefit of hydroxyurea in patients with transfusion dependent  $\beta$ -  
9  
10 thalassaemia is equivocal and has not been properly studied in randomised clinical  
11 trials. A recent Cochrane review and a meta-analysis that analysed the effect of  
12 hydroxyurea concluded that there is not enough evidence from randomized controlled  
13 trials to show hydroxyurea is effective in reducing transfusion requirements in patients  
14 with transfusion dependent thalassaemia(17, 19). These reviews recommended  
15 conducting well-designed randomized controlled trials to evaluate the same. In this  
16 paper, we present the protocol for a randomized double blind placebo controlled  
17 clinical trial to evaluates the efficacy and safety of oral hydroxyurea in transfusion  
18 dependent  $\beta$ -thalassaemia.  
19  
20  
21  
22  
23  
24  
25  
26  
27  
28  
29  
30  
31  
32  
33  
34  
35  
36  
37  
38  
39  
40  
41  
42  
43  
44  
45  
46  
47  
48  
49  
50  
51  
52  
53  
54  
55  
56  
57  
58  
59  
60

## METHODS AND ANALYSIS

### Study design and setting

This study is an ongoing single-centre, randomized, double-blind, placebo controlled clinical trial to evaluate the efficacy and safety of oral hydroxyurea for transfusion dependent  $\beta$ -thalassaemia. The study is conducted at the Adult and Adolescent Thalassaemia Centre of Colombo North Teaching Hospital, Ragama, Sri Lanka.

### Study hypothesis

Oral hydroxyurea is an effective, tolerable and safe treatment that upregulates HbF production, improves pre-transfusion haemoglobin level and decreases transfusion requirement in patients with transfusion dependent  $\beta$ -thalassaemia.

### Study population and eligibility criteria

Patients with haematologically and genetically confirmed transfusion dependent  $\beta$ -thalassaemia attending Adult and Adolescent Thalassaemia Centre of Colombo North Teaching Hospital, Ragama, Sri Lanka will consist of the study population for this clinical trial.

#### ***Inclusion criteria:***

- Patients with confirmed genotypes of homozygous/compound heterozygous  $\beta$ -thalassaemia major or HbE  $\beta$ -thalassaemia
- Patients who are aged over 12 years
- Patients who required more than 8 blood transfusions during the preceding 12 months

**Exclusion criteria:**

- Sickle  $\beta$ -thalassaemia
- Co-existing chronic liver disease
- Co-existing chronic kidney disease
- Co-existing viral hepatitis
- Patients with contraindications for hydroxyurea (eg: hypersensitivity, bone marrow depression, pregnancy and lactation)
- Patients who are expecting to get pregnant during the next 12 months
- Patients who have undergone bone marrow transplantation
- Patients on immunosuppressant therapy
- Baseline serum ferritin >5000ng/ml
- Baseline white cell count <4000/ $\mu$ L
- Baseline platelet count <150,000/ $\mu$ L
- Patients who have been started on regular transfusions for a pre-determined limited period

**Sample size**

The sample size was calculated based on an anticipated response rate of 26% in the hydroxyurea treatment group reported in previous observational studies, a type I error of 0.05 and a power of 80%(19). The calculated minimum sample size is 50 with 25 patients each in the intervention and control groups. Considering a 10% drop-out rate we aim to recruit 56 patients for the study.

### **Subject enrolment, randomisation and blinding**

All eligible patients who fulfil inclusion criteria will be given a patient information sheet to read, given time to clarify doubts with investigators before obtaining informed written consent from them (Figure 1). When the patient is below the age of 18 years, consent will be obtained from one of the parents and assent will be obtained from the patient. At the time of enrolment, information on socio-demographic background, family history, past medical history and present medical problems will be gathered using an interviewer-administered questionnaire. Height and weight will be recorded, and abdominal examination will be done to assess hepatic and splenic sizes.

Then patients will be randomised into intervention or placebo group using a stratified block randomisation method. The intervention group will receive hydroxyurea while the control group will receive a placebo. Each patient will be given a trial number for identification. Hydroxyurea or placebo is packed in sealed envelopes with the trial number of the patient at a third-party location and handed over to the investigators. Participants, data collectors, outcome adjudicators and data analysts will be blinded regarding the treatment until the final analysis of data is available.

### **Intervention**

Patients in the intervention group will receive oral hydroxyurea (manufactured by Cadila Healthcare Ltd, India) 10-20mg/kg daily for six months. Patients who weigh less than 50kg receives one 500mg capsule of hydroxyurea while those who weigh over 50kg will receive two 500mg capsules. Patients in the control group will receive the same number of capsules per body weight of a placebo which is identical in size, shape and colour to hydroxyurea. Placebo capsules contain ingredients identical to

1  
2  
3 hydroxyurea except for its active ingredient (manufactured by State Pharmaceutical  
4 Manufacturing Cooperation, Sri Lanka). All other standard treatment that includes  
5 blood transfusion and iron chelation will be continued. Patients will receive leuco-  
6 depleted packed red blood cell transfusions when haemoglobin drops below 9g/dl as  
7 per unit protocol which is in line with the International Thalassaemia Federation  
8 Guidelines(4).  
9  
10  
11  
12  
13  
14  
15  
16  
17  
18

## 19 **Study procedure**

### 20 ***Clinical evaluation***

21  
22 All patients will be reviewed at least monthly during the 6-month intervention period  
23 and followed-up for a further 6 months after discontinuation of treatment. During each  
24 review visit, a trained doctor will complete an interviewer-administered questionnaire  
25 to assess symptoms of anaemia, known and unknown adverse effects of hydroxyurea  
26 and tolerability of hydroxyurea. A complete physical examination will be done to  
27 assess weight, height, adverse effects of hydroxyurea and hepatic and splenic sizes.  
28 The exact volume of blood transfused during each visit will be recorded.  
29  
30  
31  
32  
33  
34  
35  
36  
37  
38  
39  
40  
41

### 42 ***Laboratory evaluation***

43  
44 Full blood count, haemoglobin sub-type quantification,  $\alpha$ - and  $\beta$ -globin genotyping and  
45 *Xmn1* and *BCL11A* polymorphism status will be performed at enrolment to determine  
46 the molecular characteristics of the study population. Additionally, baseline serum  
47 ferritin, creatinine, aspartate aminotransferase (AST) and alanine aminotransferase  
48 (ALT) levels will be measured at enrolment. During each follow-up visit, full blood count  
49 and quantification of HbF will be performed. Serum ferritin, creatinine, AST and ALT  
50  
51  
52  
53  
54  
55  
56  
57  
58  
59  
60

1  
2  
3 will subsequently be checked at 3-monthly intervals. Soluble transferrin receptor levels  
4  
5 will be assessed at the time of enrolment and the completion of the intervention period.  
6  
7

8  
9  
10 Full blood counts will be performed using Coulter Ac•T 5diff CP haematology  
11  
12 analyser® whereas, quantification of haemoglobin sub-types and variants will be done  
13  
14 by capillary electrophoresis using Capillarys 2 Flex Piercing® (Sebia) instrument.  
15  
16 Serum ferritin, creatinine, AST and ALT will be measured in a clinically accredited  
17  
18 laboratory using standard protocols. Soluble transferrin receptor levels will be  
19  
20 measured by enzyme linked immunosorbent assay (ELIZA) using monoclonal  
21  
22 antibodies and a commercially available ELIZA kit (R & D technologies). DNA will be  
23  
24 extracted from cell pellet using QIAGEN DNA mini kit for  $\alpha$ - and  $\beta$ -globin genotype  
25  
26 assays. Amplification-refractory mutation system (ARMS) polymerase chain reaction  
27  
28 (PCR) method will be used to detect known  $\beta$ -thalassaemia mutations by manipulating  
29  
30 the primer sequence at the 3' end. Gap-PCR method will be used to detect two  
31  
32 common deletional mutations ( $\alpha$ -<sup>3.7</sup> and  $\alpha$ -<sup>4.2</sup>) of the  $\alpha$ -globin gene and the presence of  
33  
34 excess  $\alpha$ - globin genes using previously published protocols(20). *Xmn1* and *BCL11A*  
35  
36 polymorphisms will be identified by restriction fragment length polymorphism method  
37  
38 as per published protocols(21, 22).  
39  
40  
41  
42  
43  
44  
45  
46

### 47 ***Compliance evaluation***

48  
49 At each review visit, the number of capsules actually taken by patients will be recorded  
50  
51 during the 6-month intervention period. The compliance for treatment will be assessed  
52  
53 by dividing the actual number of tablets taken by the estimated number of tablets to  
54  
55 be taken.  
56  
57  
58  
59  
60

### ***Safety evaluation***

At follow-up visits during the intervention and 6-month post-intervention periods, patients will be interviewed by a trained doctor to monitor for known and unknown adverse effects of hydroxyurea treatment. Known adverse effects of hydroxyurea include; eczema, skin depigmentation, infection, fever, headache, nausea, vomiting, constipation, gastric discomfort, leg ulcers, mucositis, weight gain, asthma, neutropenia and thrombocytopenia. Both hematological and clinical toxicity will be monitored so that patients could be discontinued from the study if toxicities are observed. All study participants will be given contact details of investigators if they wish to clarify any doubts regarding the trial and to report suspected side effects at any point of the trial.

### ***Outcome measures***

#### ***Primary outcome***

Cessation or reduction in the blood transfusion requirement during the treatment period will be the primary outcome measure.

#### ***Secondary outcomes***

1. A rise in fetal haemoglobin percentage
2. Reduction in ineffective erythropoiesis as measured by elevated soluble transferrin receptor levels
3. Compliance to treatment
4. Safety and side effects of treatment

#### ***Exploratory outcomes***

- 1
- 2
- 3 1. Effect of *Xmn1* polymorphism on response to treatment
- 4
- 5 2. Effect of *BCL11A* polymorphism on response to treatment
- 6
- 7
- 8
- 9

### 10 **Statistical analysis**

11 Data will be analysed using univariate and multivariate analysis by IBM SPSS statistics  
12 version 25. The analysis will be based on intention to treat and dropouts and  
13 discontinued patients will be included in the analysis.  
14  
15  
16  
17  
18  
19  
20

### 21 **Data management and monitoring**

22 All completed anonymised questionnaires and laboratory reports will be stored in  
23 locked cupboards with the participant serial number written on individual files. Only  
24 the investigators will have access to hard copies. The electronic database will be  
25 maintained as a password-protected file. Material obtained from blood samples will be  
26 safely destroyed after completion of the study.  
27  
28  
29  
30  
31  
32  
33  
34  
35  
36  
37

### 38 **Ethical considerations**

39 Investigators will not be involved in making management decisions (other than  
40 hydroxyurea treatment) which will be done by the clinical team caring for subjects. All  
41 decisions regarding blood transfusions will be taken by the clinical management team  
42 according to unit protocols. Patients who develop severe adverse events  
43 (haematological or clinical) related or unrelated to the treatment during the study  
44 period and those who are unable to tolerate hydroxyurea will be discontinued from the  
45 study. Suspected adverse events will be reported according to national guidelines.  
46  
47  
48  
49  
50  
51  
52  
53  
54  
55  
56  
57  
58  
59  
60  
Participants will have the right to withdraw from the trial at any point without providing  
explanations.



1  
2  
3  
4  
5 Ethical approval for the study has been obtained from the Ethics Committee of the  
6 Faculty of Medicine, University of Kelaniya (Ref. P/116/05/2018). The trial is  
7  
8 registered at the Sri Lanka Clinical Trials Registry (Ref: SLCTR/2018/024) and has  
9  
10 been approved by the National Medicinal Regulatory Authority of Sri Lanka.  
11  
12  
13  
14  
15  
16

### 17 **Termination of the trial**

18  
19 The trial will be terminated if;

- 20  
21 • New information regarding the safety or efficacy of hydroxyurea that indicates a  
22 change in the known risk/benefit profile become available, such that the  
23 risk/benefit is no longer acceptable for subjects participating in the trial  
24  
25
- 26 • Significant violation of good clinical practise that compromises the ability to  
27 achieve study objectives or compromises subject safety  
28  
29  
30  
31  
32  
33  
34

### 35 **Study status**

36  
37 The trial commenced in August 2019 according to the protocol of version 2.0, 28 May  
38 2018 and is currently open for recruitment. We have recruited 18 patients for the trial  
39  
40 so far.  
41  
42  
43  
44  
45  
46  
47  
48  
49  
50  
51  
52  
53  
54  
55  
56  
57  
58  
59  
60

## DISCUSSION

Despite being one of the first genetic diseases to be characterised precisely at the molecular level,  $\beta$ -thalassaemia remains a life-limiting disorder without an effective cure(23). Several attempts exploring different pathways are underway to devices a cure however, most of these use advanced experimental technologies like gene therapy or genome editing(24-27). Hence, these therapies may not be available to a majority of patients who live in low- and middle-income countries(28).

In this trial, we aim to determine the efficacy and safety of hydroxyurea in minimising the transfusion requirement and improving the clinical outcome of  $\beta$ -thalassaemia. Hydroxyurea is an already FDA approved drug which is currently used for other indications including sickle cell anaemia and non-transfusion dependent  $\beta$ -thalassaemia(29). However, its efficacy in patients with transfusion-dependent  $\beta$ -thalassaemia is inconclusive. This trial is designed to address this knowledge gap regarding the treatment of  $\beta$ -thalassaemia. All other previous studies which aim to evaluate the efficacy of hydroxyurea for transfusion dependent thalassaemia are either observational studies or trails without control arms(19, 30). Our study is probably the first randomised double-blind placebo-controlled clinical trial to evaluate the efficacy of hydroxyurea in transfusion dependent  $\beta$ -thalassaemia.

Previous use of hydroxyurea has suggested a starting dose of 10-15mg/kg/day and dose increments by 5mg/kg/day until a maximum tolerable dose of 35mg/kg/day is reached (31, 32). Because hydroxyurea is available as 500mg capsules, we utilised a fixed dose range of 10-20mg/kg/day for this study. After oral administration, hydroxyurea is rapidly absorbed by the gastrointestinal tract and a peak plasma

1  
2  
3 concentration is detected after 1-4 hours. Disproportionately high mean peak plasma  
4 concentration and area under the curve is associated with the increasing dose hence,  
5  
6 once daily dosing of hydroxyurea is recommended(32).  
7  
8  
9

10  
11  
12 The effects of hydroxyurea in thalassaemia could be multiple. Therefore, in the current  
13 study, we aim to evaluate the effects of hydroxyurea on HbF levels, transfusion  
14 requirement, pre-transfusion haemoglobin and ineffective erythropoiesis. Additionally,  
15 we will evaluate several factors, for example  $\alpha$ - and  $\beta$ -globin genotypes and genetic  
16 polymorphisms in the *Xmn1* and *BCL11A* loci of the genome, which may be important  
17 in determining the response to hydroxyurea. This is particularly relevant as  
18 polymorphisms in *BCL11A* and *Xmn1* have been suggested to effectively predict the  
19 response to hydroxyurea in non-transfusion dependent  $\beta$ -thalassemia patients(33,  
20 34). Therefore, through these approaches, we will be able to provide important  
21 mechanistic data on the action of hydroxyurea which is still incomplete.  
22  
23  
24  
25  
26  
27  
28  
29  
30  
31  
32  
33  
34  
35  
36  
37

### 38 **Limitations**

39  
40 One important limitation of this trial is that these patients are on regular transfusion  
41 regimens. It was deemed unethical to stop transfusions in these patients for us to  
42 evaluate the full efficacy of hydroxyurea to see whether these patients could maintain  
43 a steady-state, safe albeit lower haemoglobin level of approximately 7-8g/dl without  
44 transfusions. All patients in the trial will continue to receive standard treatment with  
45 transfusions when the haemoglobin drops below 9g/dl. Therefore, we will only be able  
46 to evaluate the reduction in transfusion requirement of these patients as an outcome  
47 measure. However, this is acceptable as most clinical trials in patients with  
48  
49  
50  
51  
52  
53  
54  
55  
56  
57  
58  
59  
60

1  
2  
3 transfusion-dependent thalassaemia have demonstrated reductions in transfusion  
4  
5 burden rather than a complete cessation of transfusions(35).  
6  
7  
8  
9

## 10 **FIGURE LEGENDS**

11  
12 Figure 1 – Study design and participant flow through the study  
13  
14  
15  
16  
17  
18  
19  
20  
21  
22  
23  
24  
25  
26  
27  
28  
29  
30  
31  
32  
33  
34  
35  
36  
37  
38  
39  
40  
41  
42  
43  
44  
45  
46  
47  
48  
49  
50  
51  
52  
53  
54  
55  
56  
57  
58  
59  
60

For peer review only

## REFERENCES

1. Taher AT, Weatherall DJ, Cappellini MD. Thalassaemia. *Lancet*. 2018;391(10116):155-67.
2. Weatherall DJ. The inherited diseases of hemoglobin are an emerging global health burden. *Blood*. 2010;115(22):4331-6.
3. Mettananda S. Management of Thalassaemia. *Sri Lanka Journal of Child Health*. 2018;47(2):159-65.
4. Cappellini MD, Cohen A, Porter J, Taher A, Viprakasit V. Guidelines for the management of transfusion dependent thalassaemia (TDT) 3rd Edition ed. Cappellini MD, Cohen A, Porter J, Taher A, Viprakasit V, editors. Cyprus: Thalassaemia International Federation; 2014.
5. Mettananda S, Pathiraja H, Peiris R, Wickramarathne N, Bandara D, de Silva U, et al. Blood transfusion therapy for beta-thalassaemia major and hemoglobin E beta-thalassaemia: Adequacy, trends, and determinants in Sri Lanka. *Pediatric blood & cancer*. 2019;66(5):e27643.
6. Suriapperuma T, Peiris R, Mettananda C, Premawardhena A, Mettananda S. Body iron status of children and adolescents with transfusion dependent beta-thalassaemia: trends of serum ferritin and associations of optimal body iron control. *BMC Res Notes*. 2018;11(1):547.
7. Mettananda S, Peiris R, Pathiraja H, Chandradasa M, Bandara D, de Silva U, et al. Psychological morbidity among children with transfusion dependent beta-thalassaemia and their parents in Sri Lanka. *PloS one*. 2020;15(2):e0228733.
8. Mettananda S, Pathiraja H, Peiris R, Bandara D, de Silva U, Mettananda C, et al. Health related quality of life among children with transfusion dependent beta-thalassaemia major and haemoglobin E beta-thalassaemia in Sri Lanka: a case control study. *Health Qual Life Outcomes*. 2019;17(1):137.
9. Mettananda S, Gibbons RJ, Higgs DR. Understanding alpha-globin gene regulation and implications for the treatment of beta-thalassaemia. *Annals of the New York Academy of Sciences*. 2016;1368(1):16-24.
10. Mettananda S, Higgs DR. Molecular Basis and Genetic Modifiers of Thalassaemia. *Hematology/oncology clinics of North America*. 2018;32(2):177-91.
11. Mettananda S, Gibbons RJ, Higgs DR. alpha-Globin as a molecular target in the treatment of beta-thalassaemia. *Blood*. 2015;125(24):3694-701.
12. Bauer DE, Kamran SC, Orkin SH. Reawakening fetal hemoglobin: prospects for new therapies for the beta-globin disorders. *Blood*. 2012;120(15):2945-53.
13. Kosaryan M, Karami H, Zafari M, Yaghobi N. Report on Patients with Non Transfusion-Dependent  $\beta$ -Thalassaemia Major Being Treated with Hydroxyurea Attending the Thalassaemia Research Center, Sari, Mazandaran Province, Islamic Republic of Iran in 2013. *Hemoglobin*. 2014;38(2):115-8.
14. Fucharoen S, Siritanaratkul N, Winichagoon P, Chowthaworn J, Siriboon W, Muangsup W, et al. Hydroxyurea increases hemoglobin F levels and improves the effectiveness of erythropoiesis in beta-thalassaemia/hemoglobin E disease. *Blood*. 1996;87(3):887-92.

15. Letvin NL, Linch DC, Beardsley GP, McIntyre KW, Nathan DG. Augmentation of fetal-hemoglobin production in anemic monkeys by hydroxyurea. *The New England journal of medicine*. 1984;310(14):869-73.
16. Algiraigri AH, Kassam A. Hydroxyurea for hemoglobin E/beta-thalassemia: a systematic review and meta-analysis. *International journal of hematology*. 2017;106(6):748-56.
17. Foong WC, Ho JJ, Loh CK, Viprakasit V. Hydroxyurea for reducing blood transfusion in non-transfusion dependent beta thalassaemias. *The Cochrane database of systematic reviews*. 2016;10:CD011579.
18. Nevitt SJ, Jones AP, Howard J. Hydroxyurea (hydroxycarbamide) for sickle cell disease. *The Cochrane database of systematic reviews*. 2017;4(4):Cd002202.
19. Algiraigri AH, Wright NAM, Paolucci EO, Kassam A. Hydroxyurea for lifelong transfusion-dependent beta-thalassemia: A meta-analysis. *Pediatric hematology and oncology*. 2017;34(8):435-48.
20. Premawardhena A, Allen A, Piel F, Fisher C, Perera L, Rodrigo R, et al. The evolutionary and clinical implications of the uneven distribution of the frequency of the inherited haemoglobin variants over short geographical distances. *Br J Haematol*. 2017;176(3):475-84.
21. Perera S, Allen A, Silva I, Hapugoda M, Wickramarathne MN, Wijesiriwardena I, et al. Genotype-phenotype association analysis identifies the role of  $\alpha$  globin genes in modulating disease severity of  $\beta$  thalassaemia intermedia in Sri Lanka. *Scientific Reports*. 2019;9(1):10116.
22. Peri KG, Gagnon J, Gagnon C, Bard H. Association of -158(C  $\rightarrow$  T) (Xmnl) DNA Polymorphism in  $\gamma$ -Globin Promoter with Delayed Switchover from Fetal to Adult Hemoglobin Synthesis. *Pediatric research*. 1997;41(2):214-7.
23. Cappellini MD, Porter JB, Viprakasit V, Taher AT. A paradigm shift on beta-thalassaemia treatment: How will we manage this old disease with new therapies? *Blood reviews*. 2018;32(4):300-11.
24. Thompson AA, Walters MC, Kwiatkowski J, Rasko JEJ, Ribeil JA, Hongeng S, et al. Gene Therapy in Patients with Transfusion-Dependent beta-Thalassemia. *The New England journal of medicine*. 2018;378(16):1479-93.
25. Mettananda S, Yasara N, Fisher CA, Taylor S, Gibbons R, Higgs D. Synergistic silencing of alpha-globin and induction of gamma-globin by histone deacetylase inhibitor, vorinostat as a potential therapy for beta-thalassaemia. *Sci Rep*. 2019;9(1):11649.
26. Mettananda S, Fisher CA, Hay D, Badat M, Quek L, Clark K, et al. Editing an alpha-globin enhancer in primary human hematopoietic stem cells as a treatment for beta-thalassemia. *Nature communications*. 2017;8(1):424.
27. Mettananda S, Fisher CA, Sloane-Stanley JA, Taylor S, Oppermann U, Gibbons RJ, et al. Selective silencing of alpha-globin by the histone demethylase inhibitor IOX1: a potentially new pathway for treatment of beta-thalassemia. *Haematologica*. 2017;102(3):e80-e4.
28. Mettananda S. Thalassaemia: In a quest towards an ultimate cure. *Sri Lanka Journal of Child Health*. 2017;46(3):203-10.

- 1
- 2
- 3
- 4 29. Algiraigri AH, Wright NAM, Paolucci EO, Kassam A. Hydroxyurea for
- 5 nontransfusion-dependent beta-thalassemia: A systematic review and meta-
- 6 analysis. *Hematol Oncol Stem Cell Ther*. 2017;10(3):116-25.
- 7
- 8 30. Bradai M, Abad MT, Pissard S, Lamraoui F, Skopinski L, de Montalembert M.
- 9 Hydroxyurea can eliminate transfusion requirements in children with severe beta-
- 10 thalassemia. *Blood*. 2003;102(4):1529-30.
- 11
- 12 31. Estep JH, Smeltzer MP, Kang G, Li C, Wang WC, Abrams C, et al. A clinically
- 13 meaningful fetal hemoglobin threshold for children with sickle cell anemia during
- 14 hydroxyurea therapy. *American journal of hematology*. 2017;92(12):1333-9.
- 15
- 16 32. Agrawal RK, Patel RK, Shah V, Nainiwal L, Trivedi B. Hydroxyurea in Sickle Cell
- 17 Disease: Drug Review. *Indian Journal of Hematology and Blood Transfusion*.
- 18 2014;30(2):91-6.
- 19
- 20 33. Banan M. Hydroxyurea treatment in  $\beta$ -thalassemia patients: to respond or not to
- 21 respond? *Annals of hematology*. 2013;92(3):289-99.
- 22
- 23 34. Pule GD, Mowla S, Novitzky N, Wonkam A. Hydroxyurea down-regulates
- 24 BCL11A, KLF-1 and MYB through miRNA-mediated actions to induce  $\gamma$ -globin
- 25 expression: implications for new therapeutic approaches of sickle cell disease.
- 26 *Clinical and Translational Medicine*. 2016;5(1):15.
- 27
- 28 35. Cappellini MD, Viprakasit V, Taher AT, Georgiev P, Kuo KHM, Coates T, et al. A
- 29 Phase 3 Trial of Luspatercept in Patients with Transfusion-Dependent  $\beta$ -
- 30 Thalassemia. *New Engl J Med*. 2020;382(13):1219-31.
- 31
- 32
- 33
- 34
- 35
- 36
- 37
- 38
- 39
- 40
- 41
- 42
- 43
- 44
- 45
- 46
- 47
- 48
- 49
- 50
- 51
- 52
- 53
- 54
- 55
- 56
- 57
- 58
- 59
- 60

1  
2  
3 **Author contributions:** AP and SM conceived the study. NY, NW, CM, AM, AP and  
4 SM contributed to the study design. NY drafted the manuscript and CM and SM  
5 finalized the manuscript. All authors assisted in developing the protocol and have read,  
6 reviewed, edited and approved the final manuscript.  
7  
8  
9  
10  
11  
12  
13

14 **Funding statement:** This work was supported by the National Research Council of  
15 Sri Lanka Investigator Driven Research Grant (Number 18-030) to SM. Funding  
16 agency does not have any role in the study design, data collection, data analysis or  
17 publication of results.  
18  
19  
20  
21  
22  
23  
24  
25

26 **Competing interests statement:** None declared.  
27  
28  
29

30 **Patient and public involvement:** It was not appropriate or possible to involve patients  
31 or the public in the design, conduct, reporting or dissemination plans of our research.  
32 Results of the investigations will be available for participants and will be used in the  
33 standard management when required.  
34  
35  
36  
37  
38  
39  
40  
41  
42  
43  
44  
45  
46  
47  
48  
49  
50  
51  
52  
53  
54  
55  
56  
57  
58  
59  
60



1  
2  
3  
4  
5  
6  
7  
8  
9  
10  
11  
12  
13  
14  
15  
16  
17  
18  
19  
20  
21  
22  
23  
24  
25  
26  
27  
28  
29  
30  
31  
32  
33  
34  
35  
36  
37  
38  
39  
40  
41  
42  
43  
44  
45  
46  
47  
48  
49  
50  
51  
52  
53  
54  
55  
56  
57  
58  
59  
60

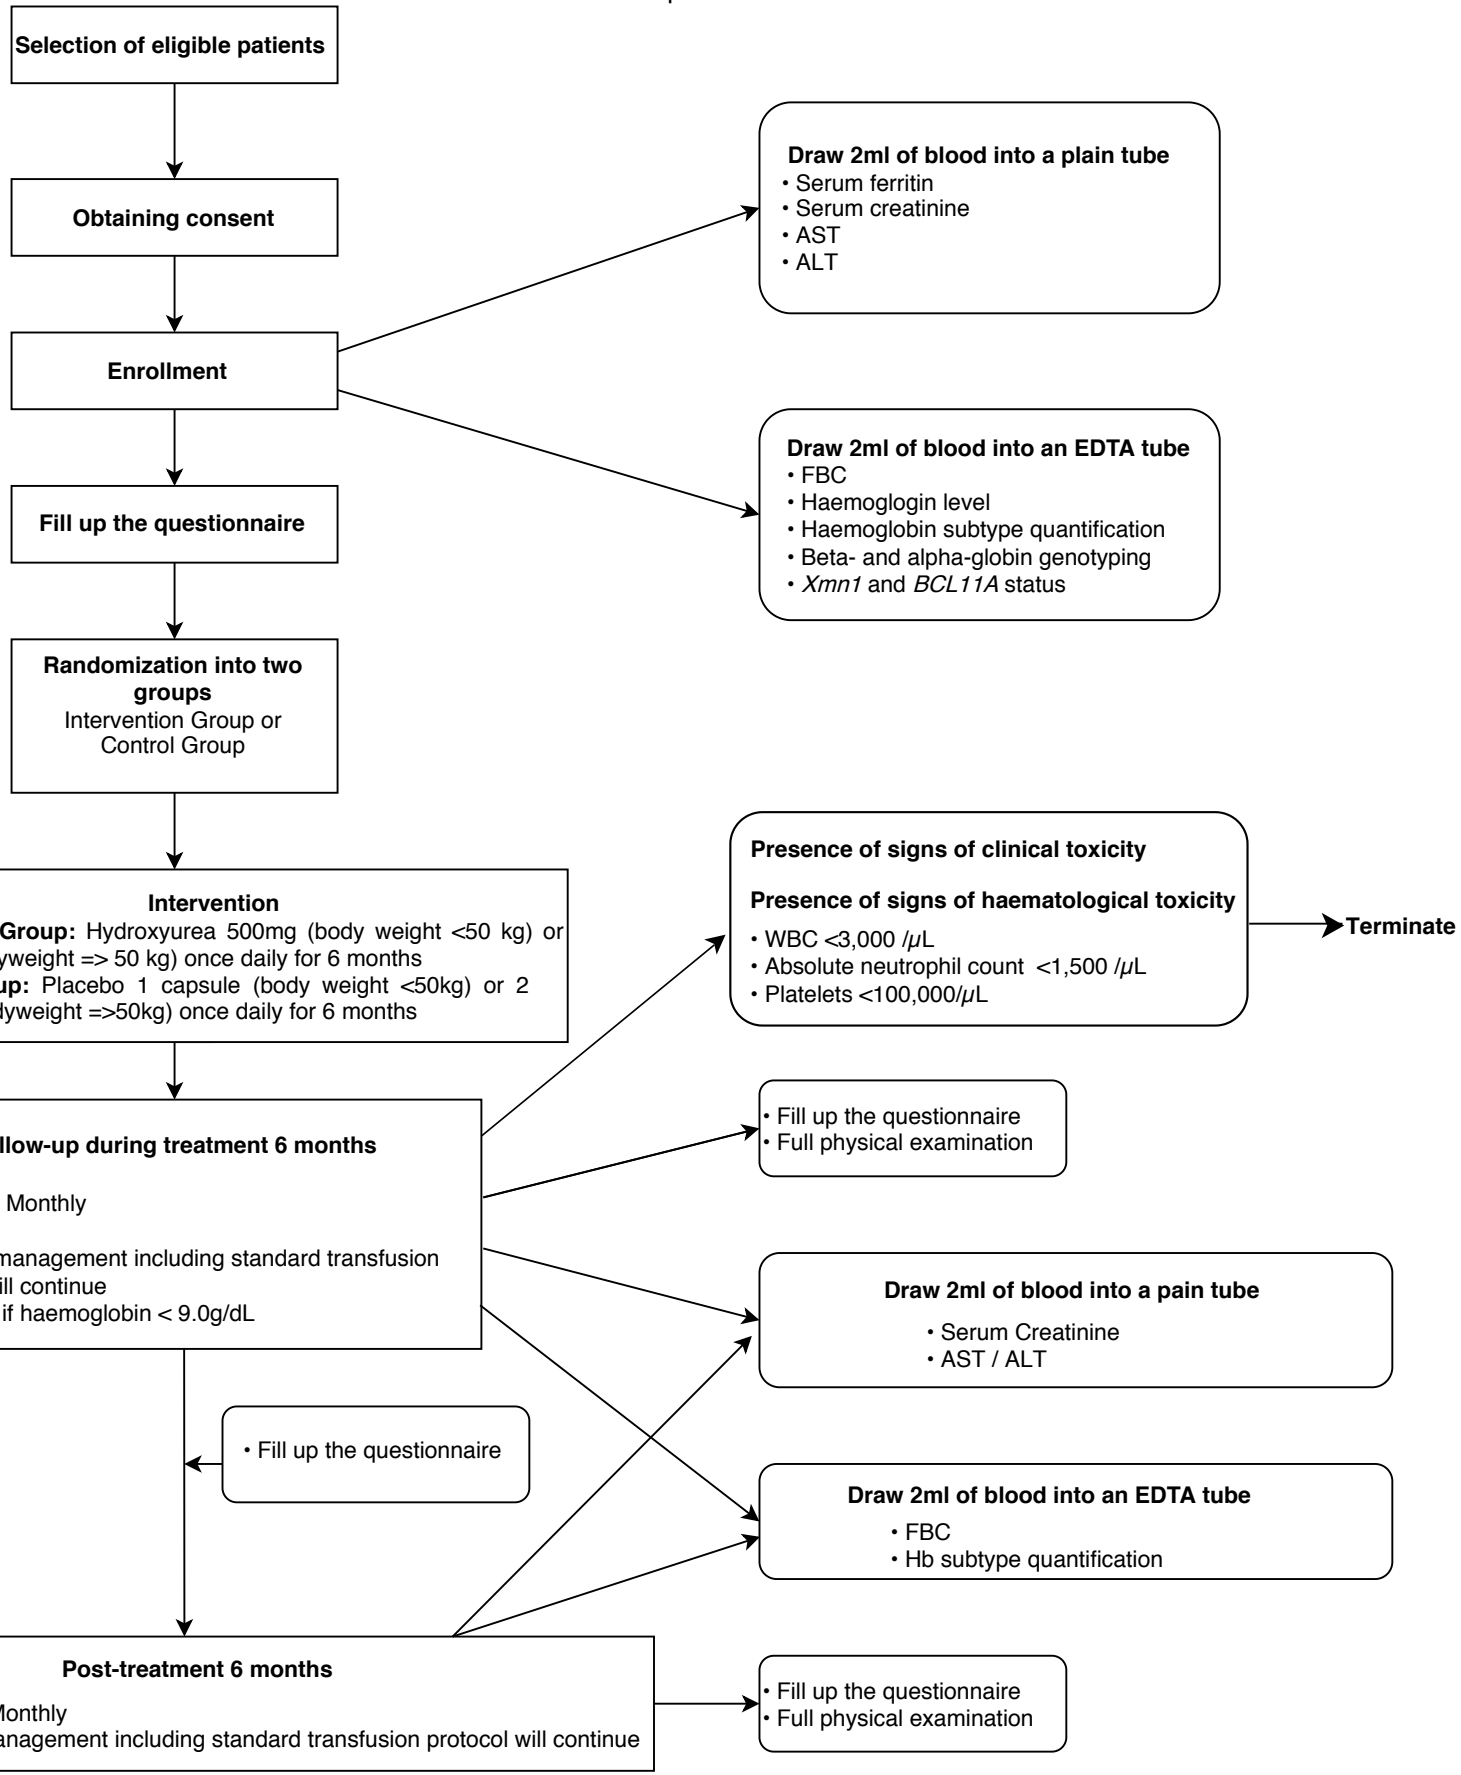

## **Research protocol checklist**

**Manuscript title:** Efficacy and safety of oral hydroxyurea for transfusion dependent  $\beta$ -thalassaemia: a protocol for randomised double-blind controlled clinical trial

SPIRIT 2013 Checklist: Recommended items to address in a clinical trial protocol and related documents\*

| <b>Section/item</b>               | <b>Item No</b> | <b>Description</b>                                                                                                                                                                                                                                                                       | <b>Included or not</b> |
|-----------------------------------|----------------|------------------------------------------------------------------------------------------------------------------------------------------------------------------------------------------------------------------------------------------------------------------------------------------|------------------------|
| <b>Administrative information</b> |                |                                                                                                                                                                                                                                                                                          |                        |
| Title                             | 1              | Descriptive title identifying the study design, population, interventions, and, if applicable, trial acronym                                                                                                                                                                             | Yes                    |
| Trial registration                | 2a             | Trial identifier and registry name. If not yet registered, name of intended registry                                                                                                                                                                                                     | Yes                    |
|                                   | 2b             | All items from the World Health Organization Trial Registration Data Set                                                                                                                                                                                                                 | Yes                    |
| Protocol version                  | 3              | Date and version identifier                                                                                                                                                                                                                                                              | Yes                    |
| Funding                           | 4              | Sources and types of financial, material, and other support                                                                                                                                                                                                                              | Yes                    |
| Roles and responsibilities        | 5a             | Names, affiliations, and roles of protocol contributors                                                                                                                                                                                                                                  | Yes                    |
|                                   | 5b             | Name and contact information for the trial sponsor                                                                                                                                                                                                                                       | Yes                    |
|                                   | 5c             | Role of study sponsor and funders, if any, in study design; collection, management, analysis, and interpretation of data; writing of the report; and the decision to submit the report for publication, including whether they will have ultimate authority over any of these activities | Yes                    |
|                                   | 5d             | Composition, roles, and responsibilities of the coordinating centre, steering committee, endpoint adjudication committee, data management team, and other individuals or groups overseeing the trial, if applicable (see Item 21a for data monitoring committee)                         | Yes                    |
| <b>Introduction</b>               |                |                                                                                                                                                                                                                                                                                          |                        |

|                                                           |     |                                                                                                                                                                                                                                                                                                                                                                                |     |
|-----------------------------------------------------------|-----|--------------------------------------------------------------------------------------------------------------------------------------------------------------------------------------------------------------------------------------------------------------------------------------------------------------------------------------------------------------------------------|-----|
| Background and rationale                                  | 6a  | Description of research question and justification for undertaking the trial, including summary of relevant studies (published and unpublished) examining benefits and harms for each intervention                                                                                                                                                                             | Yes |
|                                                           | 6b  | Explanation for choice of comparators                                                                                                                                                                                                                                                                                                                                          | Yes |
| Objectives                                                | 7   | Specific objectives or hypotheses                                                                                                                                                                                                                                                                                                                                              | Yes |
| Trial design                                              | 8   | Description of trial design including type of trial (eg, parallel group, crossover, factorial, single group), allocation ratio, and framework (eg, superiority, equivalence, noninferiority, exploratory)                                                                                                                                                                      | Yes |
| <b>Methods: Participants, interventions, and outcomes</b> |     |                                                                                                                                                                                                                                                                                                                                                                                |     |
| Study setting                                             | 9   | Description of study settings (eg, community clinic, academic hospital) and list of countries where data will be collected. Reference to where list of study sites can be obtained                                                                                                                                                                                             | Yes |
| Eligibility criteria                                      | 10  | Inclusion and exclusion criteria for participants. If applicable, eligibility criteria for study centres and individuals who will perform the interventions (eg, surgeons, psychotherapists)                                                                                                                                                                                   | Yes |
| Interventions                                             | 11a | Interventions for each group with sufficient detail to allow replication, including how and when they will be administered                                                                                                                                                                                                                                                     | Yes |
|                                                           | 11b | Criteria for discontinuing or modifying allocated interventions for a given trial participant (eg, drug dose change in response to harms, participant request, or improving/worsening disease)                                                                                                                                                                                 | Yes |
|                                                           | 11c | Strategies to improve adherence to intervention protocols, and any procedures for monitoring adherence (eg, drug tablet return, laboratory tests)                                                                                                                                                                                                                              | Yes |
|                                                           | 11d | Relevant concomitant care and interventions that are permitted or prohibited during the trial                                                                                                                                                                                                                                                                                  | Yes |
| Outcomes                                                  | 12  | Primary, secondary, and other outcomes, including the specific measurement variable (eg, systolic blood pressure), analysis metric (eg, change from baseline, final value, time to event), method of aggregation (eg, median, proportion), and time point for each outcome. Explanation of the clinical relevance of chosen efficacy and harm outcomes is strongly recommended | Yes |

|                                                                     |     |                                                                                                                                                                                                                                                                                                                                                          |     |
|---------------------------------------------------------------------|-----|----------------------------------------------------------------------------------------------------------------------------------------------------------------------------------------------------------------------------------------------------------------------------------------------------------------------------------------------------------|-----|
| Participant timeline                                                | 13  | Time schedule of enrolment, interventions (including any run-ins and washouts), assessments, and visits for participants. A schematic diagram is highly recommended (see Figure)                                                                                                                                                                         | Yes |
| Sample size                                                         | 14  | Estimated number of participants needed to achieve study objectives and how it was determined, including clinical and statistical assumptions supporting any sample size calculations                                                                                                                                                                    | Yes |
| Recruitment                                                         | 15  | Strategies for achieving adequate participant enrolment to reach target sample size                                                                                                                                                                                                                                                                      | Yes |
| <b>Methods: Assignment of interventions (for controlled trials)</b> |     |                                                                                                                                                                                                                                                                                                                                                          |     |
| Allocation:                                                         |     |                                                                                                                                                                                                                                                                                                                                                          |     |
| Sequence generation                                                 | 16a | Method of generating the allocation sequence (eg, computer-generated random numbers), and list of any factors for stratification. To reduce predictability of a random sequence, details of any planned restriction (eg, blocking) should be provided in a separate document that is unavailable to those who enrol participants or assign interventions | Yes |
| Allocation concealment mechanism                                    | 16b | Mechanism of implementing the allocation sequence (eg, central telephone; sequentially numbered, opaque, sealed envelopes), describing any steps to conceal the sequence until interventions are assigned                                                                                                                                                | Yes |
| Implementation                                                      | 16c | Who will generate the allocation sequence, who will enrol participants, and who will assign participants to interventions                                                                                                                                                                                                                                | Yes |
| Blinding (masking)                                                  | 17a | Who will be blinded after assignment to interventions (eg, trial participants, care providers, outcome assessors, data analysts), and how                                                                                                                                                                                                                | Yes |
|                                                                     | 17b | If blinded, circumstances under which unblinding is permissible, and procedure for revealing a participant's allocated intervention during the trial                                                                                                                                                                                                     | Yes |
| <b>Methods: Data collection, management, and analysis</b>           |     |                                                                                                                                                                                                                                                                                                                                                          |     |

|                                                          |                            |     |                                                                                                                                                                                                                                                                                                                                                                                                              |     |
|----------------------------------------------------------|----------------------------|-----|--------------------------------------------------------------------------------------------------------------------------------------------------------------------------------------------------------------------------------------------------------------------------------------------------------------------------------------------------------------------------------------------------------------|-----|
| 1<br>2<br>3<br>4<br>5<br>6<br>7<br>8<br>9<br>10<br>11    | Data collection methods    | 18a | Plans for assessment and collection of outcome, baseline, and other trial data, including any related processes to promote data quality (eg, duplicate measurements, training of assessors) and a description of study instruments (eg, questionnaires, laboratory tests) along with their reliability and validity, if known. Reference to where data collection forms can be found, if not in the protocol | Yes |
| 12<br>13<br>14<br>15<br>16<br>17                         |                            | 18b | Plans to promote participant retention and complete follow-up, including list of any outcome data to be collected for participants who discontinue or deviate from intervention protocols                                                                                                                                                                                                                    | Yes |
| 18<br>19<br>20<br>21<br>22<br>23<br>24                   | Data management            | 19  | Plans for data entry, coding, security, and storage, including any related processes to promote data quality (eg, double data entry; range checks for data values). Reference to where details of data management procedures can be found, if not in the protocol                                                                                                                                            | Yes |
| 25<br>26<br>27<br>28<br>29<br>30                         | Statistical methods        | 20a | Statistical methods for analysing primary and secondary outcomes. Reference to where other details of the statistical analysis plan can be found, if not in the protocol                                                                                                                                                                                                                                     | Yes |
| 31<br>32<br>33                                           |                            | 20b | Methods for any additional analyses (eg, subgroup and adjusted analyses)                                                                                                                                                                                                                                                                                                                                     | Yes |
| 34<br>35<br>36<br>37<br>38<br>39                         |                            | 20c | Definition of analysis population relating to protocol non-adherence (eg, as randomised analysis), and any statistical methods to handle missing data (eg, multiple imputation)                                                                                                                                                                                                                              | Yes |
| 40<br>41                                                 | <b>Methods: Monitoring</b> |     |                                                                                                                                                                                                                                                                                                                                                                                                              |     |
| 42<br>43<br>44<br>45<br>46<br>47<br>48<br>49<br>50       | Data monitoring            | 21a | Composition of data monitoring committee (DMC); summary of its role and reporting structure; statement of whether it is independent from the sponsor and competing interests; and reference to where further details about its charter can be found, if not in the protocol. Alternatively, an explanation of why a DMC is not needed                                                                        | Yes |
| 51<br>52<br>53<br>54<br>55<br>56<br>57<br>58<br>59<br>60 |                            | 21b | Description of any interim analyses and stopping guidelines, including who will have access to these interim results and make the final decision to terminate the trial                                                                                                                                                                                                                                      | Yes |

|                                 |     |                                                                                                                                                                                                                                                                                     |     |
|---------------------------------|-----|-------------------------------------------------------------------------------------------------------------------------------------------------------------------------------------------------------------------------------------------------------------------------------------|-----|
| Harms                           | 22  | Plans for collecting, assessing, reporting, and managing solicited and spontaneously reported adverse events and other unintended effects of trial interventions or trial conduct                                                                                                   | Yes |
| Auditing                        | 23  | Frequency and procedures for auditing trial conduct, if any, and whether the process will be independent from investigators and the sponsor                                                                                                                                         | Yes |
| <b>Ethics and dissemination</b> |     |                                                                                                                                                                                                                                                                                     |     |
| Research ethics approval        | 24  | Plans for seeking research ethics committee/institutional review board (REC/IRB) approval                                                                                                                                                                                           | Yes |
| Protocol amendments             | 25  | Plans for communicating important protocol modifications (eg, changes to eligibility criteria, outcomes, analyses) to relevant parties (eg, investigators, REC/IRBs, trial participants, trial registries, journals, regulators)                                                    | Yes |
| Consent or assent               | 26a | Who will obtain informed consent or assent from potential trial participants or authorised surrogates, and how (see Item 32)                                                                                                                                                        | Yes |
|                                 | 26b | Additional consent provisions for collection and use of participant data and biological specimens in ancillary studies, if applicable                                                                                                                                               | Yes |
| Confidentiality                 | 27  | How personal information about potential and enrolled participants will be collected, shared, and maintained in order to protect confidentiality before, during, and after the trial                                                                                                | Yes |
| Declaration of interests        | 28  | Financial and other competing interests for principal investigators for the overall trial and each study site                                                                                                                                                                       | Yes |
| Access to data                  | 29  | Statement of who will have access to the final trial dataset, and disclosure of contractual agreements that limit such access for investigators                                                                                                                                     | Yes |
| Ancillary and post-trial care   | 30  | Provisions, if any, for ancillary and post-trial care, and for compensation to those who suffer harm from trial participation                                                                                                                                                       | Yes |
| Dissemination policy            | 31a | Plans for investigators and sponsor to communicate trial results to participants, healthcare professionals, the public, and other relevant groups (eg, via publication, reporting in results databases, or other data sharing arrangements), including any publication restrictions | Yes |

|                            |     |                                                                                                                                                                                                |                      |
|----------------------------|-----|------------------------------------------------------------------------------------------------------------------------------------------------------------------------------------------------|----------------------|
|                            | 31b | Authorship eligibility guidelines and any intended use of professional writers                                                                                                                 | Yes                  |
|                            | 31c | Plans, if any, for granting public access to the full protocol, participant-level dataset, and statistical code                                                                                | Yes                  |
| <b>Appendices</b>          |     |                                                                                                                                                                                                |                      |
| Informed consent materials | 32  | Model consent form and other related documentation given to participants and authorised surrogates                                                                                             | Available on request |
| Biological specimens       | 33  | Plans for collection, laboratory evaluation, and storage of biological specimens for genetic or molecular analysis in the current trial and for future use in ancillary studies, if applicable | Yes                  |

\*It is strongly recommended that this checklist be read in conjunction with the SPIRIT 2013 Explanation & Elaboration for important clarification on the items. Amendments to the protocol should be tracked and dated. The SPIRIT checklist is copyrighted by the SPIRIT Group under the Creative Commons [“Attribution-NonCommercial-NoDerivs 3.0 Unported”](https://creativecommons.org/licenses/by-nc-nd/3.0/) license.

# BMJ Open

## Efficacy and safety of oral hydroxyurea in transfusion dependent $\beta$ -thalassaemia: a protocol for randomised double-blind controlled clinical trial

|                                 |                                                                                                                                                                                                                                                                                                                                                                                                                                                                                                                       |
|---------------------------------|-----------------------------------------------------------------------------------------------------------------------------------------------------------------------------------------------------------------------------------------------------------------------------------------------------------------------------------------------------------------------------------------------------------------------------------------------------------------------------------------------------------------------|
| Journal:                        | <i>BMJ Open</i>                                                                                                                                                                                                                                                                                                                                                                                                                                                                                                       |
| Manuscript ID                   | bmjopen-2020-041958.R1                                                                                                                                                                                                                                                                                                                                                                                                                                                                                                |
| Article Type:                   | Protocol                                                                                                                                                                                                                                                                                                                                                                                                                                                                                                              |
| Date Submitted by the Author:   | 27-Aug-2020                                                                                                                                                                                                                                                                                                                                                                                                                                                                                                           |
| Complete List of Authors:       | Yasara, Nirmani; University of Kelaniya, Department of Paediatrics<br>Wickramarathne, Nethmi; University of Kelaniya, Department of Paediatrics<br>Mettananda, Chamila; University of Kelaniya, Department of Pharmacology<br>Manamperi, Aresha ; University of Kelaniya, Molecular Medicine Unit<br>Premawardhena, Anuja; University of Kelaniya, Department of Medicine; Colombo North Teaching Hospital<br>Mettananda, Sachith; University of Kelaniya, Department of Paediatrics; Colombo North Teaching Hospital |
| <b>Primary Subject Heading</b>: | Haematology (incl blood transfusion)                                                                                                                                                                                                                                                                                                                                                                                                                                                                                  |
| Secondary Subject Heading:      | Paediatrics, Genetics and genomics                                                                                                                                                                                                                                                                                                                                                                                                                                                                                    |
| Keywords:                       | Haematopathology < PATHOLOGY, Anaemia < HAEMATOLOGY, Clinical trials < THERAPEUTICS, Genetics < TROPICAL MEDICINE                                                                                                                                                                                                                                                                                                                                                                                                     |
|                                 |                                                                                                                                                                                                                                                                                                                                                                                                                                                                                                                       |

SCHOLARONE™  
Manuscripts





I, the Submitting Author has the right to grant and does grant on behalf of all authors of the Work (as defined in the below author licence), an exclusive licence and/or a non-exclusive licence for contributions from authors who are: i) UK Crown employees; ii) where BMJ has agreed a CC-BY licence shall apply, and/or iii) in accordance with the terms applicable for US Federal Government officers or employees acting as part of their official duties; on a worldwide, perpetual, irrevocable, royalty-free basis to BMJ Publishing Group Ltd ("BMJ") its licensees and where the relevant Journal is co-owned by BMJ to the co-owners of the Journal, to publish the Work in this journal and any other BMJ products and to exploit all rights, as set out in our [licence](#).

The Submitting Author accepts and understands that any supply made under these terms is made by BMJ to the Submitting Author unless you are acting as an employee on behalf of your employer or a postgraduate student of an affiliated institution which is paying any applicable article publishing charge ("APC") for Open Access articles. Where the Submitting Author wishes to make the Work available on an Open Access basis (and intends to pay the relevant APC), the terms of reuse of such Open Access shall be governed by a Creative Commons licence – details of these licences and which [Creative Commons](#) licence will apply to this Work are set out in our licence referred to above.

Other than as permitted in any relevant BMJ Author's Self Archiving Policies, I confirm this Work has not been accepted for publication elsewhere, is not being considered for publication elsewhere and does not duplicate material already published. I confirm all authors consent to publication of this Work and authorise the granting of this licence.

**Title:** Efficacy and safety of oral hydroxyurea in transfusion dependent  $\beta$ -thalassaemia: a protocol for randomised double-blind controlled clinical trial

**Authors:** Nirmani Yasara<sup>1</sup>, Nethmi Wickramaratne<sup>1</sup>, Chamila Mettananda<sup>2</sup>, Aresha Manamperi<sup>3</sup>, Anuja Premawardhena<sup>4,5</sup>, Sachith Mettananda<sup>1,5</sup>

**Author affiliations:**

<sup>1</sup> Department of Paediatrics, Faculty of Medicine, University of Kelaniya, Sri Lanka

<sup>2</sup> Department of Pharmacology, Faculty of Medicine, University of Kelaniya, Sri Lanka

<sup>3</sup> Molecular Medicine Unit, Faculty of Medicine, University of Kelaniya, Sri Lanka

<sup>4</sup> Department of Medicine, Faculty of Medicine, University of Kelaniya, Sri Lanka

<sup>5</sup> Colombo North Teaching Hospital, Ragama, Sri Lanka

**Corresponding author:**

Name: Dr Sachith Mettananda

Address: Department of Paediatrics, Faculty of Medicine – University of Kelaniya, Thalagolla Road, Ragama 11010, Sri Lanka.

Telephone: +94112961117 Fax: +94112958337

Email: sachith.mettananda@kln.ac.lk

**Word count:** 2482

**Keywords:** Haemoglobinopathy; Anaemia; Clinical trials; Genetics

## ABSTRACT

**Introduction:** Despite being one of the first diseases to be genetically characterised,  $\beta$ -thalassaemia remains a disorder without a cure in a majority. Most patients receive only supportive treatment therefore, have a poor quality of life and shorter life spans. Hydroxyurea is a drug that has shown to induce fetal haemoglobin synthesis and is recommended for the treatment of sickle cell disease. However, its usefulness in transfusion dependent  $\beta$ -thalassaemia is unclear. Here, we present a protocol for a randomised double-blind controlled clinical trial to evaluate the efficacy and safety of oral hydroxyurea in transfusion dependent  $\beta$ -thalassaemia.

**Methods and analysis:** This is a single-centre randomised double-blind placebo controlled clinical trial conducted at the Thalassaemia Centre of Colombo North Teaching Hospital, Ragama, Sri Lanka. Adult and adolescent patients with haematologically and genetically confirmed transfusion dependent  $\beta$ -thalassaemia are enrolled and randomised into the intervention or control group. The intervention group receives oral hydroxyurea 10-20mg/kg daily for six months while the control group receives a placebo which is identical in size, shape and colour to hydroxyurea without its active ingredient. Transfused blood volume, pre-transfusion haemoglobin, fetal haemoglobin level and adverse effects of treatment are monitored during treatment and for six months post-treatment. Cessation or reduction of blood transfusions during the treatment period will be the primary outcome measure. The statistical analysis will be based on intention to treat.

1  
2  
3 **Ethics and dissemination:** Ethical approval has been obtained from the Ethics  
4  
5 Committee of Faculty of Medicine, University of Kelaniya (P/116/05/2018) and the trial  
6  
7 is approved by the National Medicinal Regulatory Authority of Sri Lanka. Results of  
8  
9 the trial will be disseminated in scientific publications in reputed journals.  
10  
11  
12  
13

14 **Registration details:** The trial is registered in the Sri Lanka Clinical Trials Registry  
15  
16 (SLCTR/2018/024).  
17  
18  
19  
20  
21  
22  
23  
24  
25  
26  
27  
28  
29  
30  
31  
32  
33  
34  
35  
36  
37  
38  
39  
40  
41  
42  
43  
44  
45  
46  
47  
48  
49  
50  
51  
52  
53  
54  
55  
56  
57  
58  
59  
60

## STRENGTHS AND LIMITATIONS OF THIS STUDY

- This study evaluates the efficacy of oral hydroxyurea among patients with  $\beta$ -thalassaemia using a randomised double-blind placebo controlled clinical trial study design
- We will evaluate the genetic and clinical characteristics of study participants to identify predictors of response to hydroxyurea
- This study evaluate the effect of hydroxyurea on multiple outcomes
- As standard transfusion protocols are continued this study will not determine the ability of hydroxyurea to maintain a safe but lower steady state haemoglobin level
- As we use pretransfusion haemoglobin cut off of 9.0g/dL, this study will not accurately measure changes in fetal haemoglobin concentration

## INTRODUCTION

$\beta$ -Thalassaemia is one of the most common genetic diseases in the world<sup>1</sup>. It is estimated that 70,000 children are born annually with  $\beta$ -thalassaemia worldwide<sup>2</sup>. The most severely affected patients develop profound anaemia during infancy which is life-threatening without blood transfusions<sup>3</sup>. The only existing cure is allogeneic haematopoietic stem cell transplantation that is available only to a small subset of patients with matched related donors<sup>4</sup>. All other patients, an overwhelming majority, are managed conservatively with supportive treatment using regular blood transfusions and iron chelation for life<sup>5 6</sup>. Due to complications of the disease, these patients experience a poor quality of life and die prematurely in their fourth or fifth decade<sup>7 8</sup>.

The pathophysiology of  $\beta$ -thalassaemia centres around the unbalanced synthesis of  $\alpha$ - and  $\beta$ -like globin chains in erythroid cells<sup>9</sup>.  $\alpha$ -Globin pairs with  $\beta$ -globin to form haemoglobin (Hb) A during postnatal life and  $\gamma$ -globin to form HbF during fetal life in healthy humans. In  $\beta$ -thalassaemia, the synthesis of normal  $\beta$ -globin is markedly reduced due to autosomal recessively inherited mutations of the  $\beta$ -globin gene<sup>10</sup>. The resultant unbalanced synthesis and accumulation of  $\alpha$ -globin chains lead to ineffective erythropoiesis and haemolysis causing severe anaemia<sup>11</sup>. Several genetic modifiers which include augmentation of the synthesis of HbF by natural mutations that reactivate  $\gamma$ -globin are known to decrease  $\alpha$ -globin excess and ameliorate the severity of  $\beta$ -thalassaemia<sup>12</sup>.

Hydroxyurea is a cytostatic agent that interrupts DNA synthesis by inhibiting the ribonucleotide reductase pathway<sup>13</sup>. It is a well-tolerated FDA approved oral

1  
2  
3 medication that is widely used in the treatment of cancers. However, it has been  
4  
5 reported as a potent inducer of  $\gamma$ -globin in human erythroid cells in several pre-clinical  
6  
7 studies<sup>14 15</sup>. It has also shown to be effective as a HbF inducing agent in patients with  
8  
9 sickle cell disease and non-transfusion dependent  $\beta$ -thalassaemia<sup>16-18</sup>. However, the  
10  
11 benefit of hydroxyurea in patients with transfusion dependent  $\beta$ -thalassaemia is  
12  
13 equivocal and has not been properly studied in randomised clinical trials<sup>19</sup>. Two recent  
14  
15 Cochrane reviews that analysed the effects of hydroxyurea concluded that there is not  
16  
17 enough evidence from randomized controlled trials to show hydroxyurea is effective  
18  
19 in reducing transfusion requirements in patients with transfusion dependent  
20  
21 thalassaemia<sup>17 20</sup>. These reviews recommended conducting well-designed  
22  
23 randomised controlled trials to evaluate the same. In this paper, we present the  
24  
25 protocol for a randomised double blind placebo controlled clinical trial to evaluate the  
26  
27 efficacy and safety of oral hydroxyurea in transfusion dependent  $\beta$ -thalassaemia.  
28  
29  
30  
31  
32  
33  
34  
35  
36  
37  
38  
39  
40  
41  
42  
43  
44  
45  
46  
47  
48  
49  
50  
51  
52  
53  
54  
55  
56  
57  
58  
59  
60

## METHODS AND ANALYSIS

### Study design and setting

This study is an ongoing single-centre, randomised, double-blind, placebo controlled clinical trial to evaluate the efficacy and safety of oral hydroxyurea for transfusion dependent  $\beta$ -thalassaemia. The study is conducted at the Adult and Adolescent Thalassaemia Centre of Colombo North Teaching Hospital, Ragama, Sri Lanka.

### Study hypothesis

Oral hydroxyurea is an effective, tolerable and safe treatment that upregulates HbF production, improves pre-transfusion haemoglobin level and decreases transfusion requirement in patients with transfusion dependent  $\beta$ -thalassaemia.

### Study population and eligibility criteria

Patients with haematologically and genetically confirmed transfusion dependent  $\beta$ -thalassaemia attending Adult and Adolescent Thalassaemia Centre of Colombo North Teaching Hospital, Ragama, Sri Lanka will consist of the study population for this clinical trial.

#### ***Inclusion criteria:***

- Patients with confirmed genotypes of homozygous/compound heterozygous  $\beta$ -thalassaemia major or HbE  $\beta$ -thalassaemia
- Patients who are aged over 12 years
- Patients who required more than 8 blood transfusions during the preceding 12 months



**Exclusion criteria:**

- Sickle  $\beta$ -thalassaemia
- Co-existing chronic liver disease
- Co-existing chronic kidney disease
- Co-existing viral hepatitis
- Patients with contraindications for hydroxyurea (eg: hypersensitivity, bone marrow depression, pregnancy and lactation)
- Patients who are expecting to get pregnant during the next 12 months
- Patients who have undergone bone marrow transplantation
- Patients on immunosuppressant therapy
- Baseline serum ferritin >5000ng/mL
- Baseline white cell count <4000/ $\mu$ L
- Baseline platelet count <150,000/ $\mu$ L
- Patients who have been started on regular transfusions for a pre-determined limited period

**Sample size**

The sample size was calculated based on an anticipated response rate of 26% in the hydroxyurea treatment group reported in previous observational studies, a type I error of 0.05 and a power of 80%<sup>19</sup>. The calculated minimum sample size is 50 with 25 patients each in the intervention and control groups. Considering a 10% drop-out rate we aim to recruit 56 patients for the study.

### **Subject enrolment, randomisation and blinding**

All eligible patients who fulfil inclusion criteria will be given a patient information sheet to read, given time to clarify doubts with investigators before obtaining informed written consent from them (Figure 1). When the patient is below the age of 18 years, consent will be obtained from one of the parents and assent will be obtained from the patient. At the time of enrolment, information on socio-demographic background, family history, past medical history and present medical problems will be gathered using an interviewer-administered questionnaire. Height and weight will be recorded, and abdominal examination will be done to assess hepatic and splenic sizes.

Then patients will be randomised into intervention or placebo group using a stratified block randomisation method. The intervention group will receive hydroxyurea while the control group will receive a placebo. Each patient will be given a trial number for identification. Hydroxyurea or placebo is packed in sealed envelopes with the trial number of the patient at a third-party location and handed over to the investigators. Participants, data collectors, outcome adjudicators and data analysts will be blinded regarding the treatment until the final analysis of data is available.

### **Intervention**

Patients in the intervention group will receive oral hydroxyurea (manufactured by Cadila Healthcare Ltd, India) 10-20mg/kg daily for six months. Patients who weigh less than 50kg receives one 500mg capsule of hydroxyurea while those who weigh over 50kg will receive two 500mg capsules. Patients in the control group will receive the same number of capsules per body weight of a placebo which is identical in size, shape and colour to hydroxyurea. Placebo capsules contain ingredients identical to

1  
2  
3 hydroxyurea except for its active ingredient (manufactured by State Pharmaceutical  
4 Manufacturing Cooperation, Sri Lanka). All other standard treatment that includes  
5 blood transfusion and iron chelation will be continued. Patients will receive leuco-  
6 depleted packed red blood cell transfusions when haemoglobin drops below 9g/dL as  
7 per unit protocol which is in line with the International Thalassaemia Federation  
8 Guidelines<sup>4</sup>.  
9  
10  
11  
12  
13  
14  
15  
16  
17  
18

## 19 **Study procedure**

### 20 ***Clinical evaluation***

21  
22 All patients will be reviewed at least monthly during the 6-month intervention period  
23 and followed-up for a further 6 months after discontinuation of treatment. During each  
24 review visit, a trained doctor will complete an interviewer-administered questionnaire  
25 to assess symptoms of anaemia, known and unknown adverse effects of hydroxyurea  
26 and tolerability of hydroxyurea. A complete physical examination will be done to  
27 assess weight, height, adverse effects of hydroxyurea and hepatic and splenic sizes.  
28 The exact volume of blood transfused during each visit will be recorded.  
29  
30  
31  
32  
33  
34  
35  
36  
37  
38  
39  
40  
41

### 42 ***Laboratory evaluation***

43  
44 Full blood count, haemoglobin sub-type quantification,  $\alpha$ - and  $\beta$ -globin genotyping and  
45 *Xmn1* and *BCL11A* polymorphism status will be performed at enrolment to determine  
46 the molecular characteristics of the study population. Additionally, baseline serum  
47 ferritin, creatinine, aspartate aminotransferase (AST) and alanine aminotransferase  
48 (ALT) levels will be measured at enrolment. During each follow-up visit, full blood count  
49 and quantification of HbF will be performed. Serum ferritin, creatinine, AST and ALT  
50  
51  
52  
53  
54  
55  
56  
57  
58  
59  
60

1  
2  
3 will subsequently be checked at 3-monthly intervals. Soluble transferrin receptor levels  
4  
5 will be assessed at the time of enrolment and the completion of the intervention period.  
6  
7  
8  
9

10 Full blood counts will be performed using Coulter Ac•T 5diff CP haematology  
11 analyser® whereas, quantification of haemoglobin sub-types and variants will be done  
12 by capillary electrophoresis using Capillarys 2 Flex Piercing® (Sebia) instrument.  
13  
14 Serum ferritin, creatinine, AST and ALT will be measured in a clinically accredited  
15 laboratory using standard protocols. Soluble transferrin receptor levels will be  
16 measured by enzyme linked immunosorbent assay (ELIZA) using monoclonal  
17 antibodies and a commercially available ELIZA kit (R & D technologies). DNA will be  
18 extracted from cell pellet using QIAGEN DNA mini kit for  $\alpha$ - and  $\beta$ -globin genotype  
19 assays. Amplification-refractory mutation system (ARMS) polymerase chain reaction  
20 (PCR) method will be used to detect known  $\beta$ -thalassaemia mutations by manipulating  
21 the primer sequence at the 3' end. Gap-PCR method will be used to detect two  
22 common deletional mutations ( $\alpha$ -<sup>3.7</sup> and  $\alpha$ -<sup>4.2</sup>) of the  $\alpha$ -globin gene and the presence of  
23 excess  $\alpha$ - globin genes using previously published protocols<sup>21</sup>. *Xmn1* and *BCL11A*  
24 polymorphisms will be identified by restriction fragment length polymorphism method  
25 as per published protocols<sup>22 23</sup>.  
26  
27  
28  
29  
30  
31  
32  
33  
34  
35  
36  
37  
38  
39  
40  
41  
42  
43  
44  
45  
46  
47  
48

### 49 **Compliance evaluation**

50 At each review visit, the number of capsules actually taken by patients will be recorded  
51 during the 6-month intervention period. The compliance for treatment will be assessed  
52 by dividing the actual number of tablets taken by the estimated number of tablets to  
53 be taken.  
54  
55  
56  
57  
58  
59  
60

### ***Safety evaluation***

At follow-up visits during the intervention and 6-month post-intervention periods, patients will be interviewed by a trained doctor to monitor for known and unknown adverse effects of hydroxyurea treatment. Known adverse effects of hydroxyurea include; eczema, skin depigmentation, infection, fever, headache, nausea, vomiting, constipation, gastric discomfort, leg ulcers, mucositis, weight gain, asthma, neutropenia and thrombocytopenia. Both hematological and clinical toxicity will be monitored so that patients could be discontinued from the study if toxicities are observed. All study participants will be given contact details of investigators if they wish to clarify any doubts regarding the trial and to report suspected side effects at any point of the trial.

### ***Outcome measures***

#### ***Primary outcome***

Cessation or reduction in the blood transfusion requirement during the treatment period will be the primary outcome measure.

#### ***Secondary outcomes***

1. A rise in fetal haemoglobin percentage
2. Reduction in ineffective erythropoiesis as measured by elevated soluble transferrin receptor levels
3. Compliance to treatment
4. Safety and side effects of treatment

#### ***Exploratory outcomes***

- 1
- 2
- 3 1. Effect of *Xmn1* polymorphism on response to treatment
- 4
- 5 2. Effect of *BCL11A* polymorphism on response to treatment
- 6
- 7
- 8
- 9

### 10 **Statistical analysis**

11 Data will be analysed using univariate and multivariate analysis by IBM SPSS statistics  
12 version 25. The analysis will be based on intention to treat and dropouts and  
13 discontinued patients will be included in the analysis.  
14  
15  
16  
17  
18  
19  
20

### 21 **Data management and monitoring**

22 All completed anonymised questionnaires and laboratory reports will be stored in  
23 locked cupboards with the participant serial numbers written on individual files. Only  
24 the investigators will have access to hard copies. The electronic database will be  
25 maintained as a password-protected file. Material obtained from blood samples will be  
26 safely destroyed after completion of the study. A three-member independent data  
27 monitoring committee comprised of a paediatrician, a haematologist and a  
28 biostatistician has been appointed to make appropriate recommendations on  
29 participant safety and trial integrity.  
30  
31  
32  
33  
34  
35  
36  
37  
38  
39  
40  
41  
42  
43  
44

### 45 **Ethical considerations**

46 Investigators will not be involved in making management decisions (other than  
47 hydroxyurea treatment) which will be done by the clinical team caring for subjects. All  
48 decisions regarding blood transfusions will be taken by the clinical management team  
49 according to unit protocols. Patients who develop severe adverse events  
50 (haematological or clinical) related or unrelated to the treatment during the study  
51 period and those who are unable to tolerate hydroxyurea will be discontinued from the  
52  
53  
54  
55  
56  
57  
58  
59  
60

1  
2  
3 study. Suspected adverse events will be reported according to the national guidelines.  
4  
5 Participants will have the right to withdraw from the trail at any point without providing  
6  
7 explanations.  
8  
9

10  
11  
12 Ethical approval for the study has been obtained from the Ethics Committee of the  
13  
14 Faculty of Medicine, University of Kelaniya, Sri Lanka (Ref. P/116/05/2018). The trial  
15  
16 is registered at the Sri Lanka Clinical Trials Registry (Ref: SLCTR/2018/024) and is  
17  
18 approved by the National Medicinal Regulatory Authority of Sri Lanka.  
19  
20  
21

### 22 23 24 **Termination of the trial**

25  
26 The trial will be terminated if;

- 27  
28 • New information regarding the safety or efficacy of hydroxyurea that indicates a  
29  
30 change in the known risk/benefit profile become available, such that the  
31  
32 risk/benefit is no longer acceptable for subjects participating in the trial  
33  
34
- 35  
36 • Significant violation of good clinical practise that compromises the ability to  
37  
38 achieve study objectives or compromises subject safety  
39  
40

### 41 42 **Study status**

43  
44 The trial commenced in August 2019 according to the protocol of version 2.0, 28 May  
45  
46 2018 and is currently open for recruitment. We have recruited 18 patients for the trial  
47  
48 so far.  
49  
50

### 51 52 **Patient and public involvement**

53  
54 The research question related to this clinical trial was based on the positive feedback  
55  
56 from patients with non-transfusion dependent  $\beta$ -thalassaemia who are already taking  
57  
58  
59  
60

1  
2  
3 oral hydroxyurea. Reports of the investigations done as part of the trial will be available  
4 to all participants and used in the standard management when required. The results  
5 of the study will be disseminated to study participants and all patients with  $\beta$ -  
6 thalassaemia in Sri Lanka using patient education lectures after completion of the trial.  
7  
8  
9  
10  
11  
12  
13  
14  
15  
16  
17  
18  
19  
20  
21  
22  
23  
24  
25  
26  
27  
28  
29  
30  
31  
32  
33  
34  
35  
36  
37  
38  
39  
40  
41  
42  
43  
44  
45  
46  
47  
48  
49  
50  
51  
52  
53  
54  
55  
56  
57  
58  
59  
60

For peer review only



## DISCUSSION

Despite being one of the first genetic diseases to be characterised precisely at the molecular level,  $\beta$ -thalassaemia remains a life-limiting disorder without an effective cure<sup>24</sup>. Several attempts exploring different pathways are underway to devise a cure however, most of these use advanced experimental technologies like gene therapy or genome editing<sup>25-28</sup>. Hence, these therapies may not be available to a majority of patients who live in low- and middle-income countries<sup>29</sup>.

In this trial, we aim to determine the efficacy and safety of hydroxyurea in minimising the transfusion requirement and improving the clinical outcome of transfusion dependent  $\beta$ -thalassaemia. Hydroxyurea is an already FDA approved drug which is currently used for other indications including sickle cell anaemia and non-transfusion dependent  $\beta$ -thalassaemia<sup>30</sup>. However, its efficacy in patients with transfusion-dependent  $\beta$ -thalassaemia is inconclusive. This trial is designed to address this knowledge gap regarding the treatment of  $\beta$ -thalassaemia. All other previous studies which aim to evaluate the efficacy of hydroxyurea for transfusion dependent thalassaemia are either observational studies or trials without control arms<sup>19 31-34</sup>. Our study is probably the first randomised double-blind placebo-controlled clinical trial to evaluate the efficacy of hydroxyurea in transfusion dependent  $\beta$ -thalassaemia.

Previous use of hydroxyurea has suggested a starting dose of 10-15mg/kg/day and dose increments by 5mg/kg/day until a maximum tolerable dose of 35mg/kg/day is reached<sup>35 36</sup>. Because hydroxyurea is available as 500mg capsules, we utilised a fixed dose range of 10-20mg/kg/day for this study. After oral administration, hydroxyurea is rapidly absorbed by the gastrointestinal tract and a peak plasma concentration is

1  
2  
3 detected after 1-4 hours. Disproportionately high mean peak plasma concentration  
4  
5 and area under the curve is associated with the increasing dose hence, once daily  
6  
7 dosing of hydroxyurea is recommended<sup>36</sup>.  
8  
9

10  
11  
12 The effects of hydroxyurea in thalassaemia could be multiple. Therefore, in the current  
13  
14 study, we aim to evaluate the effects of hydroxyurea on transfusion requirement, pre-  
15  
16 transfusion haemoglobin, HbF levels and ineffective erythropoiesis. Additionally, we  
17  
18 will evaluate several factors, for example  $\alpha$ - and  $\beta$ -globin genotypes and genetic  
19  
20 polymorphisms in the *Xmn1* and *BCL11A* loci of the genome, which may be important  
21  
22 in determining the response to hydroxyurea. This is particularly relevant as  
23  
24 polymorphisms in *BCL11A* and *Xmn1* have been suggested to effectively predict the  
25  
26 response to hydroxyurea in non-transfusion dependent  $\beta$ -thalassemia patients<sup>37 38</sup>.  
27  
28 Therefore, through these approaches, we will be able to provide important mechanistic  
29  
30 data on the action of hydroxyurea which is still incomplete.  
31  
32  
33  
34  
35  
36  
37

### 38 **Limitations**

39  
40 One important limitation of this trial is that these patients are on regular transfusion  
41  
42 regimens. It was deemed unethical to stop transfusions in these patients for us to  
43  
44 evaluate the full efficacy of hydroxyurea to see whether these patients could maintain  
45  
46 a steady-state, safe albeit lower haemoglobin level of approximately 7-8g/dL without  
47  
48 transfusions. All patients in the trial will continue to receive standard treatment with  
49  
50 transfusions when the haemoglobin drops below 9g/dL. Therefore, we will only be able  
51  
52 to evaluate the reduction in transfusion requirement of these patients as an outcome  
53  
54 measure. Similarly, we may not be able to fully evaluate the effects on HbF. However,  
55  
56 this is acceptable as most clinical trials in patients with transfusion-dependent  
57  
58  
59  
60

1  
2  
3 thalassaemia have demonstrated reductions in transfusion burden rather than a  
4  
5 complete cessation of transfusions<sup>39</sup>.  
6  
7  
8  
9

## 10 **FIGURE LEGENDS**

11  
12 Figure 1 – Study design and participant flow through the study  
13  
14  
15  
16  
17  
18  
19  
20  
21  
22  
23  
24  
25  
26  
27  
28  
29  
30  
31  
32  
33  
34  
35  
36  
37  
38  
39  
40  
41  
42  
43  
44  
45  
46  
47  
48  
49  
50  
51  
52  
53  
54  
55  
56  
57  
58  
59  
60

For peer review only

## REFERENCES

1. Taher AT, Weatherall DJ, Cappellini MD. Thalassaemia. *Lancet* 2018;391(10116):155-67. doi: 10.1016/S0140-6736(17)31822-6 [published Online First: 2017/08/05]
2. Weatherall DJ. The inherited diseases of hemoglobin are an emerging global health burden. *Blood* 2010;115(22):4331-6. doi: 10.1182/blood-2010-01-251348 [published Online First: 2010/03/18]
3. Mettananda S. Management of Thalassaemia. *Sri Lanka Journal of Child Health* 2018;47(2):159-65.
4. Cappellini MD, Cohen A, Porter J, et al. Guidelines for the management of transfusion dependent thalassaemia (TDT) 3rd Edition ed. Cyprus: Thalassaemia International Federation 2014.
5. Mettananda S, Pathiraja H, Peiris R, et al. Blood transfusion therapy for beta-thalassemia major and hemoglobin E beta-thalassemia: Adequacy, trends, and determinants in Sri Lanka. *Pediatric blood & cancer* 2019;66(5):e27643. doi: 10.1002/pbc.27643 [published Online First: 2019/01/31]
6. Suriapperuma T, Peiris R, Mettananda C, et al. Body iron status of children and adolescents with transfusion dependent beta-thalassaemia: trends of serum ferritin and associations of optimal body iron control. *BMC Res Notes* 2018;11(1):547. doi: 10.1186/s13104-018-3634-9 [published Online First: 2018/08/04]
7. Mettananda S, Peiris R, Pathiraja H, et al. Psychological morbidity among children with transfusion dependent beta-thalassaemia and their parents in Sri Lanka. *PLoS one* 2020;15(2):e0228733. doi: 10.1371/journal.pone.0228733 [published Online First: 2020/02/12]
8. Mettananda S, Pathiraja H, Peiris R, et al. Health related quality of life among children with transfusion dependent beta-thalassaemia major and haemoglobin E beta-thalassaemia in Sri Lanka: a case control study. *Health Qual Life Outcomes* 2019;17(1):137. doi: 10.1186/s12955-019-1207-9 [published Online First: 2019/08/10]
9. Mettananda S, Gibbons RJ, Higgs DR. Understanding alpha-globin gene regulation and implications for the treatment of beta-thalassemia. *Annals of the New York Academy of Sciences* 2016;1368(1):16-24. doi: 10.1111/nyas.12988 [published Online First: 2015/12/24]
10. Mettananda S, Higgs DR. Molecular Basis and Genetic Modifiers of Thalassemia. *Hematology/oncology clinics of North America* 2018;32(2):177-91. doi: 10.1016/j.hoc.2017.11.003 [published Online First: 2018/02/21]
11. Mettananda S, Gibbons RJ, Higgs DR. alpha-Globin as a molecular target in the treatment of beta-thalassemia. *Blood* 2015;125(24):3694-701. doi: 10.1182/blood-2015-03-633594 [published Online First: 2015/04/15]
12. Bauer DE, Kamran SC, Orkin SH. Reawakening fetal hemoglobin: prospects for new therapies for the beta-globin disorders. *Blood* 2012;120(15):2945-53. doi: 10.1182/blood-2012-06-292078 [published Online First: 2012/08/21]

- 1  
2  
3 13. Kosaryan M, Karami H, Zafari M, et al. Report on Patients with Non Transfusion-  
4 Dependent  $\beta$ -Thalassemia Major Being Treated with Hydroxyurea Attending the  
5 Thalassemia Research Center, Sari, Mazandaran Province, Islamic Republic of  
6 Iran in 2013. *Hemoglobin* 2014;38(2):115-18. doi:  
7 10.3109/03630269.2013.869229  
8
- 9  
10 14. Fucharoen S, Siritanaratkul N, Winichagoon P, et al. Hydroxyurea increases  
11 hemoglobin F levels and improves the effectiveness of erythropoiesis in beta-  
12 thalassemia/hemoglobin E disease. *Blood* 1996;87(3):887-92. [published Online  
13 First: 1996/02/01]  
14
- 15 15. Letvin NL, Linch DC, Beardsley GP, et al. Augmentation of fetal-hemoglobin  
16 production in anemic monkeys by hydroxyurea. *The New England journal of*  
17 *medicine* 1984;310(14):869-73. doi: 10.1056/NEJM198404053101401 [published  
18 Online First: 1984/04/05]  
19
- 20 16. Algirairi AH, Kassam A. Hydroxyurea for hemoglobin E/beta-thalassemia: a  
21 systematic review and meta-analysis. *International journal of hematology*  
22 2017;106(6):748-56. doi: 10.1007/s12185-017-2307-0 [published Online First:  
23 2017/08/09]  
24
- 25 17. Foong WC, Ho JJ, Loh CK, et al. Hydroxyurea for reducing blood transfusion in  
26 non-transfusion dependent beta thalassaemias. *The Cochrane database of*  
27 *systematic reviews* 2016;10:CD011579. doi: 10.1002/14651858.CD011579.pub2  
28 [published Online First: 2016/11/02]  
29
- 30 18. Nevitt SJ, Jones AP, Howard J. Hydroxyurea (hydroxycarbamide) for sickle cell  
31 disease. *The Cochrane database of systematic reviews* 2017;4(4):Cd002202. doi:  
32 10.1002/14651858.CD002202.pub2 [published Online First: 2017/04/21]  
33
- 34 19. Algirairi AH, Wright NAM, Paolucci EO, et al. Hydroxyurea for lifelong transfusion-  
35 dependent beta-thalassemia: A meta-analysis. *Pediatric hematology and*  
36 *oncology* 2017;34(8):435-48. doi: 10.1080/08880018.2017.1354948 [published  
37 Online First: 2018/01/18]  
38
- 39 20. Ansari SH, Lassi ZS, Khowaja SM, et al. Hydroxyurea (hydroxycarbamide) for  
40 transfusion-dependent  $\beta$ -thalassaemia. *The Cochrane database of systematic*  
41 *reviews* 2019;3(3):Cd012064. doi: 10.1002/14651858.CD012064.pub2 [published  
42 Online First: 2019/03/19]  
43
- 44 21. Premawardhena A, Allen A, Piel F, et al. The evolutionary and clinical implications  
45 of the uneven distribution of the frequency of the inherited haemoglobin variants  
46 over short geographical distances. *Br J Haematol* 2017;176(3):475-84. doi:  
47 10.1111/bjh.14437  
48
- 49 22. Perera S, Allen A, Silva I, et al. Genotype-phenotype association analysis identifies  
50 the role of  $\alpha$  globin genes in modulating disease severity of  $\beta$  thalassaemia  
51 intermedia in Sri Lanka. *Scientific Reports* 2019;9(1):10116. doi: 10.1038/s41598-  
52 019-46674-y  
53
- 54 23. Peri KG, Gagnon J, Gagnon C, et al. Association of -158(C  $\rightarrow$  T) (Xmnl) DNA  
55 Polymorphism in  $\gamma$ -Globin Promoter with Delayed Switchover from Fetal to Adult  
56 Hemoglobin Synthesis. *Pediatric research* 1997;41(2):214-17. doi:  
57 10.1203/00006450-199702000-00010  
58  
59  
60

- 1  
2  
3 24. Cappellini MD, Porter JB, Viprakasit V, et al. A paradigm shift on beta-  
4 thalassaemia treatment: How will we manage this old disease with new therapies?  
5 *Blood reviews* 2018;32(4):300-11. doi: 10.1016/j.blre.2018.02.001 [published  
6 Online First: 2018/02/20]  
7
- 8 25. Thompson AA, Walters MC, Kwiatkowski J, et al. Gene Therapy in Patients with  
9 Transfusion-Dependent beta-Thalassemia. *The New England journal of medicine*  
10 2018;378(16):1479-93. doi: 10.1056/NEJMoa1705342 [published Online First:  
11 2018/04/19]  
12
- 13 26. Mettananda S, Yasara N, Fisher CA, et al. Synergistic silencing of alpha-globin  
14 and induction of gamma-globin by histone deacetylase inhibitor, vorinostat as a  
15 potential therapy for beta-thalassaemia. *Sci Rep* 2019;9(1):11649. doi:  
16 10.1038/s41598-019-48204-2 [published Online First: 2019/08/14]  
17
- 18 27. Mettananda S, Fisher CA, Hay D, et al. Editing an alpha-globin enhancer in primary  
19 human hematopoietic stem cells as a treatment for beta-thalassemia. *Nature*  
20 *communications* 2017;8(1):424. doi: 10.1038/s41467-017-00479-7 [published  
21 Online First: 2017/09/06]  
22
- 23 28. Mettananda S, Fisher CA, Sloane-Stanley JA, et al. Selective silencing of alpha-  
24 globin by the histone demethylase inhibitor IOX1: a potentially new pathway for  
25 treatment of beta-thalassemia. *Haematologica* 2017;102(3):e80-e84. doi:  
26 10.3324/haematol.2016.155655 [published Online First: 2016/11/05]  
27
- 28 29. Mettananda S. Thalassaemia: In a quest towards an ultimate cure. *Sri Lanka*  
29 *Journal of Child Health* 2017;46(3):203-10.  
30
- 31 30. Algiraigri AH, Wright NAM, Paolucci EO, et al. Hydroxyurea for nontransfusion-  
32 dependent beta-thalassemia: A systematic review and meta-analysis. *Hematol*  
33 *Oncol Stem Cell Ther* 2017;10(3):116-25. doi: 10.1016/j.hemonc.2017.02.002  
34 [published Online First: 2017/04/15]  
35
- 36 31. Bradai M, Abad MT, Pissard S, et al. Hydroxyurea can eliminate transfusion  
37 requirements in children with severe beta-thalassemia. *Blood* 2003;102(4):1529-  
38 30. doi: 10.1182/blood-2003-01-0117 [published Online First: 2003/04/19]  
39
- 40 32. Ansari SH, Shamsi TS, Munzir S, et al. Gγ-Xmn I polymorphism: a significant  
41 determinant of β-thalassemia treatment without blood transfusion. *Journal of*  
42 *pediatric hematology/oncology* 2013;35(4):e153-6. doi:  
43 10.1097/MPH.0b013e31827e8662 [published Online First: 2013/02/08]  
44
- 45 33. Ansari SH, Shamsi TS, Ashraf M, et al. Efficacy of hydroxyurea in providing  
46 transfusion independence in β-thalassemia. *Journal of pediatric*  
47 *hematology/oncology* 2011;33(5):339-43. doi: 10.1097/MPH.0b013e31821b0770  
48 [published Online First: 2011/05/24]  
49
- 50 34. Karimi M, Haghpanah S, Farhadi A, et al. Genotype-phenotype relationship of  
51 patients with β-thalassemia taking hydroxyurea: a 13-year experience in Iran.  
52 *International journal of hematology* 2012;95(1):51-6. doi: 10.1007/s12185-011-  
53 0985-6 [published Online First: 2011/12/20]  
54
- 55 35. Estep JH, Smeltzer MP, Kang G, et al. A clinically meaningful fetal hemoglobin  
56 threshold for children with sickle cell anemia during hydroxyurea therapy.  
57 *American journal of hematology* 2017;92(12):1333-39. doi: 10.1002/ajh.24906  
58 [published Online First: 2017/09/16]  
59  
60

- 1  
2  
3 36. Agrawal RK, Patel RK, shah V, et al. Hydroxyurea in Sickle Cell Disease: Drug  
4 Review. *Indian Journal of Hematology and Blood Transfusion* 2014;30(2):91-96.  
5 doi: 10.1007/s12288-013-0261-4  
6  
7 37. Banan M. Hydroxyurea treatment in  $\beta$ -thalassemia patients: to respond or not to  
8 respond? *Annals of hematology* 2013;92(3):289-99. doi: 10.1007/s00277-012-  
9 1671-3  
10  
11 38. Pule GD, Mowla S, Novitzky N, et al. Hydroxyurea down-regulates BCL11A, KLF-1  
12 and MYB through miRNA-mediated actions to induce  $\gamma$ -globin expression:  
13 implications for new therapeutic approaches of sickle cell disease. *Clinical and*  
14 *Translational Medicine* 2016;5(1):15. doi: 10.1186/s40169-016-0092-7  
15  
16 39. Cappellini MD, Viprakasit V, Taher AT, et al. A Phase 3 Trial of Luspatercept in  
17 Patients with Transfusion-Dependent  $\beta$ -Thalassemia. *New Engl J Med*  
18 2020;382(13):1219-31. doi: 10.1056/NEJMoa1910182  
19  
20  
21  
22  
23  
24  
25  
26  
27  
28  
29  
30  
31  
32  
33  
34  
35  
36  
37  
38  
39  
40  
41  
42  
43  
44  
45  
46  
47  
48  
49  
50  
51  
52  
53  
54  
55  
56  
57  
58  
59  
60

1  
2  
3 **Author contributions:** AP and SM conceived the study. NY, NW, CM, AM, AP and  
4 SM contributed to the study design. NY drafted the manuscript and CM and SM  
5 finalized the manuscript. All authors assisted in developing the protocol and have read,  
6 reviewed, edited and approved the final manuscript.  
7  
8  
9  
10  
11  
12

13  
14 **Funding statement:** This work was supported by the National Research Council of  
15 Sri Lanka Investigator Driven Research Grant (Number 18-030) to SM. Funding  
16 agency does not have any role in the study design, data collection, data analysis or  
17 publication of results.  
18  
19  
20  
21  
22  
23  
24  
25

26 **Competing interests statement:** None declared.  
27  
28  
29  
30  
31  
32  
33  
34  
35  
36  
37  
38  
39  
40  
41  
42  
43  
44  
45  
46  
47  
48  
49  
50  
51  
52  
53  
54  
55  
56  
57  
58  
59  
60



1  
2  
3  
4  
5  
6  
7  
8  
9  
10  
11  
12  
13  
14  
15  
16  
17  
18  
19  
20  
21  
22  
23  
24  
25  
26  
27  
28  
29  
30  
31  
32  
33  
34  
35  
36  
37  
38  
39  
40  
41  
42  
43  
44  
45  
46  
47  
48  
49  
50  
51  
52  
53  
54  
55  
56  
57  
58  
59  
60

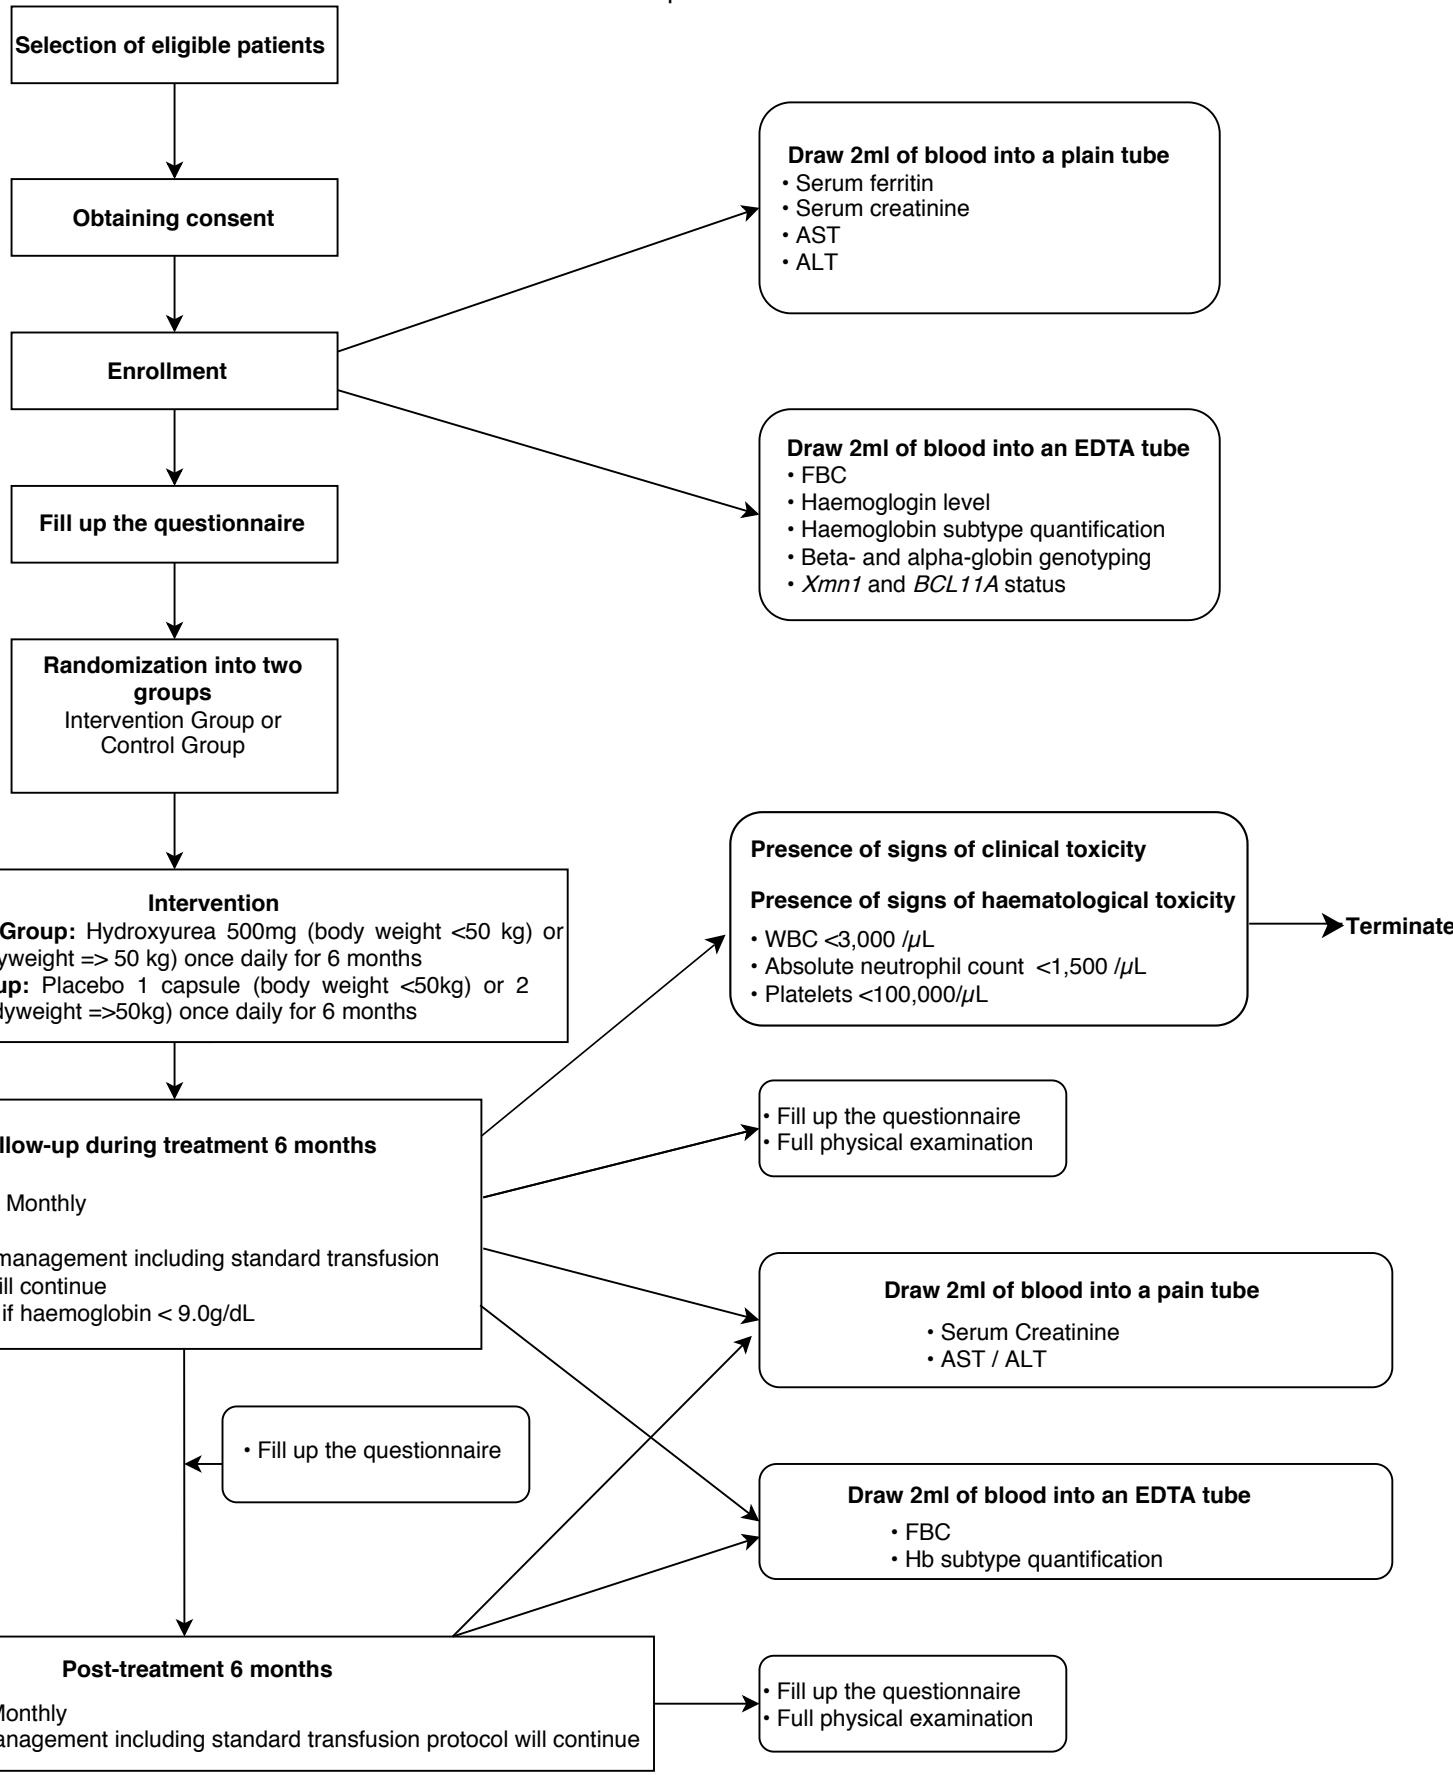

## **Research protocol checklist**

**Manuscript title:** Efficacy and safety of oral hydroxyurea for transfusion dependent  $\beta$ -thalassaemia: a protocol for randomised double-blind controlled clinical trial

SPIRIT 2013 Checklist: Recommended items to address in a clinical trial protocol and related documents\*

| <b>Section/item</b>               | <b>Item No</b> | <b>Description</b>                                                                                                                                                                                                                                                                       | <b>Page number/s</b> |
|-----------------------------------|----------------|------------------------------------------------------------------------------------------------------------------------------------------------------------------------------------------------------------------------------------------------------------------------------------------|----------------------|
| <b>Administrative information</b> |                |                                                                                                                                                                                                                                                                                          |                      |
| Title                             | 1              | Descriptive title identifying the study design, population, interventions, and, if applicable, trial acronym                                                                                                                                                                             | 1                    |
| Trial registration                | 2a             | Trial identifier and registry name. If not yet registered, name of intended registry                                                                                                                                                                                                     | 3                    |
|                                   | 2b             | All items from the World Health Organization Trial Registration Data Set                                                                                                                                                                                                                 | 3, 14                |
| Protocol version                  | 3              | Date and version identifier                                                                                                                                                                                                                                                              | 14                   |
| Funding                           | 4              | Sources and types of financial, material, and other support                                                                                                                                                                                                                              | 23                   |
| Roles and responsibilities        | 5a             | Names, affiliations, and roles of protocol contributors                                                                                                                                                                                                                                  | 1                    |
|                                   | 5b             | Name and contact information for the trial sponsor                                                                                                                                                                                                                                       | 23                   |
|                                   | 5c             | Role of study sponsor and funders, if any, in study design; collection, management, analysis, and interpretation of data; writing of the report; and the decision to submit the report for publication, including whether they will have ultimate authority over any of these activities | 23                   |
|                                   | 5d             | Composition, roles, and responsibilities of the coordinating centre, steering committee, endpoint adjudication committee, data management team, and other individuals or groups overseeing the trial, if applicable (see Item 21a for data monitoring committee)                         | 13                   |
| <b>Introduction</b>               |                |                                                                                                                                                                                                                                                                                          |                      |

|                                                                                        |                                                           |     |                                                                                                                                                                                                                                                                                                                                                                                |       |
|----------------------------------------------------------------------------------------|-----------------------------------------------------------|-----|--------------------------------------------------------------------------------------------------------------------------------------------------------------------------------------------------------------------------------------------------------------------------------------------------------------------------------------------------------------------------------|-------|
| 1<br>2<br>3<br>4<br>5<br>6<br>7                                                        | Background and rationale                                  | 6a  | Description of research question and justification for undertaking the trial, including summary of relevant studies (published and unpublished) examining benefits and harms for each intervention                                                                                                                                                                             | 5,6   |
| 8<br>9                                                                                 |                                                           | 6b  | Explanation for choice of comparators                                                                                                                                                                                                                                                                                                                                          | 5,6   |
| 10<br>11                                                                               | Objectives                                                | 7   | Specific objectives or hypotheses                                                                                                                                                                                                                                                                                                                                              | 7     |
| 12<br>13<br>14<br>15<br>16                                                             | Trial design                                              | 8   | Description of trial design including type of trial (eg, parallel group, crossover, factorial, single group), allocation ratio, and framework (eg, superiority, equivalence, noninferiority, exploratory)                                                                                                                                                                      | 7     |
| 17                                                                                     | <b>Methods: Participants, interventions, and outcomes</b> |     |                                                                                                                                                                                                                                                                                                                                                                                |       |
| 18<br>19<br>20<br>21<br>22<br>23<br>24                                                 | Study setting                                             | 9   | Description of study settings (eg, community clinic, academic hospital) and list of countries where data will be collected. Reference to where list of study sites can be obtained                                                                                                                                                                                             | 7     |
| 25<br>26<br>27<br>28<br>29<br>30                                                       | Eligibility criteria                                      | 10  | Inclusion and exclusion criteria for participants. If applicable, eligibility criteria for study centres and individuals who will perform the interventions (eg, surgeons, psychotherapists)                                                                                                                                                                                   | 7,8   |
| 31<br>32<br>33<br>34<br>35<br>36<br>37<br>38<br>39<br>40<br>41<br>42<br>43<br>44<br>45 | Interventions                                             | 11a | Interventions for each group with sufficient detail to allow replication, including how and when they will be administered                                                                                                                                                                                                                                                     | 9-11  |
| 46<br>47<br>48                                                                         |                                                           | 11b | Criteria for discontinuing or modifying allocated interventions for a given trial participant (eg, drug dose change in response to harms, participant request, or improving/worsening disease)                                                                                                                                                                                 | 11-12 |
| 49<br>50<br>51<br>52<br>53<br>54<br>55<br>56<br>57                                     |                                                           | 11c | Strategies to improve adherence to intervention protocols, and any procedures for monitoring adherence (eg, drug tablet return, laboratory tests)                                                                                                                                                                                                                              | 13    |
| 58<br>59<br>60                                                                         |                                                           | 11d | Relevant concomitant care and interventions that are permitted or prohibited during the trial                                                                                                                                                                                                                                                                                  | 10-12 |
|                                                                                        | Outcomes                                                  | 12  | Primary, secondary, and other outcomes, including the specific measurement variable (eg, systolic blood pressure), analysis metric (eg, change from baseline, final value, time to event), method of aggregation (eg, median, proportion), and time point for each outcome. Explanation of the clinical relevance of chosen efficacy and harm outcomes is strongly recommended | 12,13 |

|                                                                     |     |                                                                                                                                                                                                                                                                                                                                                          |                |
|---------------------------------------------------------------------|-----|----------------------------------------------------------------------------------------------------------------------------------------------------------------------------------------------------------------------------------------------------------------------------------------------------------------------------------------------------------|----------------|
| Participant timeline                                                | 13  | Time schedule of enrolment, interventions (including any run-ins and washouts), assessments, and visits for participants. A schematic diagram is highly recommended (see Figure)                                                                                                                                                                         | 9-13, Figure 1 |
| Sample size                                                         | 14  | Estimated number of participants needed to achieve study objectives and how it was determined, including clinical and statistical assumptions supporting any sample size calculations                                                                                                                                                                    | 8              |
| Recruitment                                                         | 15  | Strategies for achieving adequate participant enrolment to reach target sample size                                                                                                                                                                                                                                                                      | 8              |
| <b>Methods: Assignment of interventions (for controlled trials)</b> |     |                                                                                                                                                                                                                                                                                                                                                          |                |
| Allocation:                                                         |     |                                                                                                                                                                                                                                                                                                                                                          |                |
| Sequence generation                                                 | 16a | Method of generating the allocation sequence (eg, computer-generated random numbers), and list of any factors for stratification. To reduce predictability of a random sequence, details of any planned restriction (eg, blocking) should be provided in a separate document that is unavailable to those who enrol participants or assign interventions | 9              |
| Allocation concealment mechanism                                    | 16b | Mechanism of implementing the allocation sequence (eg, central telephone; sequentially numbered, opaque, sealed envelopes), describing any steps to conceal the sequence until interventions are assigned                                                                                                                                                | 9              |
| Implementation                                                      | 16c | Who will generate the allocation sequence, who will enrol participants, and who will assign participants to interventions                                                                                                                                                                                                                                | 9              |
| Blinding (masking)                                                  | 17a | Who will be blinded after assignment to interventions (eg, trial participants, care providers, outcome assessors, data analysts), and how                                                                                                                                                                                                                | 9              |
|                                                                     | 17b | If blinded, circumstances under which unblinding is permissible, and procedure for revealing a participant's allocated intervention during the trial                                                                                                                                                                                                     | 9              |
| <b>Methods: Data collection, management, and analysis</b>           |     |                                                                                                                                                                                                                                                                                                                                                          |                |

|                                                          |                            |     |                                                                                                                                                                                                                                                                                                                                                                                                              |       |
|----------------------------------------------------------|----------------------------|-----|--------------------------------------------------------------------------------------------------------------------------------------------------------------------------------------------------------------------------------------------------------------------------------------------------------------------------------------------------------------------------------------------------------------|-------|
| 1<br>2<br>3<br>4<br>5<br>6<br>7<br>8<br>9<br>10<br>11    | Data collection methods    | 18a | Plans for assessment and collection of outcome, baseline, and other trial data, including any related processes to promote data quality (eg, duplicate measurements, training of assessors) and a description of study instruments (eg, questionnaires, laboratory tests) along with their reliability and validity, if known. Reference to where data collection forms can be found, if not in the protocol | 10-12 |
| 12<br>13<br>14<br>15<br>16<br>17                         |                            | 18b | Plans to promote participant retention and complete follow-up, including list of any outcome data to be collected for participants who discontinue or deviate from intervention protocols                                                                                                                                                                                                                    | 10-12 |
| 18<br>19<br>20<br>21<br>22<br>23<br>24                   | Data management            | 19  | Plans for data entry, coding, security, and storage, including any related processes to promote data quality (eg, double data entry; range checks for data values). Reference to where details of data management procedures can be found, if not in the protocol                                                                                                                                            | 13    |
| 25<br>26<br>27<br>28<br>29<br>30                         | Statistical methods        | 20a | Statistical methods for analysing primary and secondary outcomes. Reference to where other details of the statistical analysis plan can be found, if not in the protocol                                                                                                                                                                                                                                     | 13    |
| 31<br>32<br>33                                           |                            | 20b | Methods for any additional analyses (eg, subgroup and adjusted analyses)                                                                                                                                                                                                                                                                                                                                     | 13    |
| 34<br>35<br>36<br>37<br>38<br>39                         |                            | 20c | Definition of analysis population relating to protocol non-adherence (eg, as randomised analysis), and any statistical methods to handle missing data (eg, multiple imputation)                                                                                                                                                                                                                              | 13    |
| 40                                                       | <b>Methods: Monitoring</b> |     |                                                                                                                                                                                                                                                                                                                                                                                                              |       |
| 41<br>42<br>43<br>44<br>45<br>46<br>47<br>48<br>49<br>50 | Data monitoring            | 21a | Composition of data monitoring committee (DMC); summary of its role and reporting structure; statement of whether it is independent from the sponsor and competing interests; and reference to where further details about its charter can be found, if not in the protocol. Alternatively, an explanation of why a DMC is not needed                                                                        | 13    |
| 51<br>52<br>53<br>54<br>55<br>56<br>57<br>58<br>59<br>60 |                            | 21b | Description of any interim analyses and stopping guidelines, including who will have access to these interim results and make the final decision to terminate the trial                                                                                                                                                                                                                                      | 14    |

|                                 |     |                                                                                                                                                                                                                                                                                     |           |
|---------------------------------|-----|-------------------------------------------------------------------------------------------------------------------------------------------------------------------------------------------------------------------------------------------------------------------------------------|-----------|
| Harms                           | 22  | Plans for collecting, assessing, reporting, and managing solicited and spontaneously reported adverse events and other unintended effects of trial interventions or trial conduct                                                                                                   | 12-14     |
| Auditing                        | 23  | Frequency and procedures for auditing trial conduct, if any, and whether the process will be independent from investigators and the sponsor                                                                                                                                         | 13        |
| <b>Ethics and dissemination</b> |     |                                                                                                                                                                                                                                                                                     |           |
| Research ethics approval        | 24  | Plans for seeking research ethics committee/institutional review board (REC/IRB) approval                                                                                                                                                                                           | 13,14     |
| Protocol amendments             | 25  | Plans for communicating important protocol modifications (eg, changes to eligibility criteria, outcomes, analyses) to relevant parties (eg, investigators, REC/IRBs, trial participants, trial registries, journals, regulators)                                                    | 13,14     |
| Consent or assent               | 26a | Who will obtain informed consent or assent from potential trial participants or authorised surrogates, and how (see Item 32)                                                                                                                                                        | 9         |
|                                 | 26b | Additional consent provisions for collection and use of participant data and biological specimens in ancillary studies, if applicable                                                                                                                                               | 9         |
| Confidentiality                 | 27  | How personal information about potential and enrolled participants will be collected, shared, and maintained in order to protect confidentiality before, during, and after the trial                                                                                                | 13        |
| Declaration of interests        | 28  | Financial and other competing interests for principal investigators for the overall trial and each study site                                                                                                                                                                       | 23        |
| Access to data                  | 29  | Statement of who will have access to the final trial dataset, and disclosure of contractual agreements that limit such access for investigators                                                                                                                                     | 13        |
| Ancillary and post-trial care   | 30  | Provisions, if any, for ancillary and post-trial care, and for compensation to those who suffer harm from trial participation                                                                                                                                                       | 11-12     |
| Dissemination policy            | 31a | Plans for investigators and sponsor to communicate trial results to participants, healthcare professionals, the public, and other relevant groups (eg, via publication, reporting in results databases, or other data sharing arrangements), including any publication restrictions | 3, 14, 15 |

|                            |     |                                                                                                                                                                                                |                      |
|----------------------------|-----|------------------------------------------------------------------------------------------------------------------------------------------------------------------------------------------------|----------------------|
|                            | 31b | Authorship eligibility guidelines and any intended use of professional writers                                                                                                                 | 23                   |
|                            | 31c | Plans, if any, for granting public access to the full protocol, participant-level dataset, and statistical code                                                                                | n/a                  |
| <b>Appendices</b>          |     |                                                                                                                                                                                                |                      |
| Informed consent materials | 32  | Model consent form and other related documentation given to participants and authorised surrogates                                                                                             | Available on request |
| Biological specimens       | 33  | Plans for collection, laboratory evaluation, and storage of biological specimens for genetic or molecular analysis in the current trial and for future use in ancillary studies, if applicable | 10-11                |

\*It is strongly recommended that this checklist be read in conjunction with the SPIRIT 2013 Explanation & Elaboration for important clarification on the items. Amendments to the protocol should be tracked and dated. The SPIRIT checklist is copyrighted by the SPIRIT Group under the Creative Commons "[Attribution-NonCommercial-NoDerivs 3.0 Unported](https://creativecommons.org/licenses/by-nc-nd/3.0/)" license.

# BMJ Open

## Efficacy and safety of oral hydroxyurea in transfusion dependent $\beta$ -thalassaemia: a protocol for randomised double-blind controlled clinical trial

|                                 |                                                                                                                                                                                                                                                                                                                                                                                                                                                                                                                       |
|---------------------------------|-----------------------------------------------------------------------------------------------------------------------------------------------------------------------------------------------------------------------------------------------------------------------------------------------------------------------------------------------------------------------------------------------------------------------------------------------------------------------------------------------------------------------|
| Journal:                        | <i>BMJ Open</i>                                                                                                                                                                                                                                                                                                                                                                                                                                                                                                       |
| Manuscript ID                   | bmjopen-2020-041958.R2                                                                                                                                                                                                                                                                                                                                                                                                                                                                                                |
| Article Type:                   | Protocol                                                                                                                                                                                                                                                                                                                                                                                                                                                                                                              |
| Date Submitted by the Author:   | 03-Oct-2020                                                                                                                                                                                                                                                                                                                                                                                                                                                                                                           |
| Complete List of Authors:       | Yasara, Nirmani; University of Kelaniya, Department of Paediatrics<br>Wickramarathne, Nethmi; University of Kelaniya, Department of Paediatrics<br>Mettananda, Chamila; University of Kelaniya, Department of Pharmacology<br>Manamperi, Aresha ; University of Kelaniya, Molecular Medicine Unit<br>Premawardhena, Anuja; University of Kelaniya, Department of Medicine; Colombo North Teaching Hospital<br>Mettananda, Sachith; University of Kelaniya, Department of Paediatrics; Colombo North Teaching Hospital |
| <b>Primary Subject Heading</b>: | Haematology (incl blood transfusion)                                                                                                                                                                                                                                                                                                                                                                                                                                                                                  |
| Secondary Subject Heading:      | Paediatrics, Genetics and genomics                                                                                                                                                                                                                                                                                                                                                                                                                                                                                    |
| Keywords:                       | Haematopathology < PATHOLOGY, Anaemia < HAEMATOLOGY, Clinical trials < THERAPEUTICS, Genetics < TROPICAL MEDICINE                                                                                                                                                                                                                                                                                                                                                                                                     |
|                                 |                                                                                                                                                                                                                                                                                                                                                                                                                                                                                                                       |

SCHOLARONE™  
Manuscripts





I, the Submitting Author has the right to grant and does grant on behalf of all authors of the Work (as defined in the below author licence), an exclusive licence and/or a non-exclusive licence for contributions from authors who are: i) UK Crown employees; ii) where BMJ has agreed a CC-BY licence shall apply, and/or iii) in accordance with the terms applicable for US Federal Government officers or employees acting as part of their official duties; on a worldwide, perpetual, irrevocable, royalty-free basis to BMJ Publishing Group Ltd ("BMJ") its licensees and where the relevant Journal is co-owned by BMJ to the co-owners of the Journal, to publish the Work in this journal and any other BMJ products and to exploit all rights, as set out in our [licence](#).

The Submitting Author accepts and understands that any supply made under these terms is made by BMJ to the Submitting Author unless you are acting as an employee on behalf of your employer or a postgraduate student of an affiliated institution which is paying any applicable article publishing charge ("APC") for Open Access articles. Where the Submitting Author wishes to make the Work available on an Open Access basis (and intends to pay the relevant APC), the terms of reuse of such Open Access shall be governed by a Creative Commons licence – details of these licences and which [Creative Commons](#) licence will apply to this Work are set out in our licence referred to above.

Other than as permitted in any relevant BMJ Author's Self Archiving Policies, I confirm this Work has not been accepted for publication elsewhere, is not being considered for publication elsewhere and does not duplicate material already published. I confirm all authors consent to publication of this Work and authorise the granting of this licence.

**Title:** Efficacy and safety of oral hydroxyurea in transfusion dependent  $\beta$ -thalassaemia: a protocol for randomised double-blind controlled clinical trial

**Authors:** Nirmani Yasara<sup>1</sup>, Nethmi Wickramaratne<sup>1</sup>, Chamila Mettananda<sup>2</sup>, Aresha Manamperi<sup>3</sup>, Anuja Premawardhena<sup>4,5</sup>, Sachith Mettananda<sup>1,5</sup>

**Author affiliations:**

<sup>1</sup> Department of Paediatrics, Faculty of Medicine, University of Kelaniya, Sri Lanka

<sup>2</sup> Department of Pharmacology, Faculty of Medicine, University of Kelaniya, Sri Lanka

<sup>3</sup> Molecular Medicine Unit, Faculty of Medicine, University of Kelaniya, Sri Lanka

<sup>4</sup> Department of Medicine, Faculty of Medicine, University of Kelaniya, Sri Lanka

<sup>5</sup> Colombo North Teaching Hospital, Ragama, Sri Lanka

**Corresponding author:**

Name: Prof Sachith Mettananda

Address: Department of Paediatrics, Faculty of Medicine – University of Kelaniya, Thalagolla Road, Ragama 11010, Sri Lanka.

Telephone: +94112961117 Fax: +94112958337

Email: sachith.mettananda@kln.ac.lk

**Word count:** 2482

**Keywords:** Haemoglobinopathy; Anaemia; Clinical trials; Genetics

## ABSTRACT

**Introduction:** Despite being one of the first diseases to be genetically characterised,  $\beta$ -thalassaemia remains a disorder without a cure in a majority of patients. Most patients with  $\beta$ -thalassaemia receive only supportive treatment and therefore have a poor quality of life and shorter life spans. Hydroxyurea, which has shown to induce fetal haemoglobin synthesis in human erythroid cells is currently recommended for the treatment of sickle cell disease. However, its clinical usefulness in transfusion dependent  $\beta$ -thalassaemia is unclear. Here, we present a protocol for a randomised double-blind controlled clinical trial to evaluate the efficacy and safety of oral hydroxyurea in transfusion dependent  $\beta$ -thalassaemia.

**Methods and analysis:** This single-centre randomised double-blind placebo-controlled clinical trial is conducted at the Thalassaemia Centre of Colombo North Teaching Hospital, Ragama, Sri Lanka. Adult and adolescent patients with haematologically and genetically confirmed transfusion dependent  $\beta$ -thalassaemia are enrolled and randomised into the intervention or control group. The intervention group receives oral hydroxyurea 10-20mg/kg daily for six months while the control group receives a placebo which is identical in size, shape and colour to hydroxyurea without its active ingredient. Transfused blood volume, pre-transfusion haemoglobin level, fetal haemoglobin percentage and adverse effects of treatment are monitored during treatment and six months post-treatment. Cessation or reduction of blood transfusions during the treatment period will be the primary outcome measure. The statistical analysis will be based on intention to treat.

1  
2  
3  
4  
5  
6 **Ethics and dissemination:** Ethical approval has been obtained from the Ethics  
7  
8 Committee of Faculty of Medicine, University of Kelaniya (P/116/05/2018) and the trial  
9  
10 is approved by the National Medicinal Regulatory Authority of Sri Lanka. Results of  
11  
12 the trial will be disseminated in scientific publications in reputed journals.  
13  
14  
15  
16

17 **Registration details:** The trial is registered in the Sri Lanka Clinical Trials Registry  
18  
19 (SLCTR/2018/024).  
20  
21  
22  
23  
24  
25  
26  
27  
28  
29  
30  
31  
32  
33  
34  
35  
36  
37  
38  
39  
40  
41  
42  
43  
44  
45  
46  
47  
48  
49  
50  
51  
52  
53  
54  
55  
56  
57  
58  
59  
60

## STRENGTHS AND LIMITATIONS OF THIS STUDY

- This study evaluates the efficacy of oral hydroxyurea among patients with  $\beta$ -thalassaemia using a randomised double-blind placebo-controlled clinical trial study design
- We will evaluate the genetic and clinical characteristics of study participants to identify predictors of response to hydroxyurea treatment
- This study evaluates the effects of hydroxyurea on multiple outcomes
- As standard transfusion protocols are continued, this study will not determine the ability of hydroxyurea to maintain a safe but lower steady-state haemoglobin level
- As we use pretransfusion haemoglobin cut-off of 9.0g/dL, this study will not precisely measure changes in fetal haemoglobin percentage

## INTRODUCTION

$\beta$ -Thalassaemia is one of the most common genetic diseases in the world<sup>1</sup>. It is estimated that 70,000 children are born annually with  $\beta$ -thalassaemia worldwide<sup>2</sup>. The most severely affected patients develop profound anaemia during infancy, that is life-threatening without blood transfusions<sup>3</sup>. The only existing cure is allogeneic haematopoietic stem cell transplantation, which is available only to a small subset of patients with human leukocyte antigen matched sibling donors<sup>4</sup>. All other patients, an overwhelming majority, are managed conservatively with supportive treatment with regular blood transfusions and iron chelation for life<sup>5 6</sup>. Due to complications of the disease, these patients experience a poor quality of life and die prematurely in their fourth or fifth decade<sup>7 8</sup>.

The pathophysiology of  $\beta$ -thalassaemia centres around the unbalanced synthesis of  $\alpha$ - and  $\beta$ -like globin chains in erythroid cells<sup>9</sup>. In healthy humans,  $\alpha$ -globin pairs with  $\beta$ - and  $\gamma$ -globin to form haemoglobin (Hb) A during postnatal life and HbF during fetal life, respectively. In  $\beta$ -thalassaemia, the synthesis of normal  $\beta$ -globin is markedly reduced due to autosomal recessively inherited mutations of the  $\beta$ -globin gene<sup>10</sup>. The resultant unbalanced synthesis and accumulation of  $\alpha$ -globin chains lead to ineffective erythropoiesis and haemolysis, thus cause severe anaemia<sup>11</sup>. Several genetic modifiers, which include augmentation of the synthesis of HbF by natural mutations that re-activate  $\gamma$ -globin, are known to decrease  $\alpha$ -globin excess and ameliorate the severity of  $\beta$ -thalassaemia<sup>12</sup>.

Hydroxyurea is a cytostatic agent that interrupts DNA synthesis by inhibiting the ribonucleotide reductase pathway<sup>13</sup>. It is a well-tolerated FDA approved oral

1  
2  
3 medication that is widely used in the treatment of cancers. However, it has been  
4  
5 reported as a potent inducer of  $\gamma$ -globin in human erythroid cells in several pre-clinical  
6  
7 studies<sup>14 15</sup>. It has also shown to be effective as a HbF inducing agent in patients with  
8  
9 sickle cell disease and non-transfusion dependent  $\beta$ -thalassaemia<sup>16-18</sup>. However, the  
10  
11 benefit of hydroxyurea in patients with transfusion dependent  $\beta$ -thalassaemia is  
12  
13 equivocal and has not been properly studied in randomised clinical trials<sup>19</sup>. Two recent  
14  
15 Cochrane reviews that analysed the effects of hydroxyurea concluded, that the  
16  
17 available evidence from clinical trials is insufficient to show hydroxyurea is effective in  
18  
19 patients with transfusion dependent thalassaemia<sup>17 20</sup>. These reviews recommended  
20  
21 conducting well-designed randomised controlled clinical trials to evaluate the effects  
22  
23 of hydroxyurea in patients with transfusion dependent  $\beta$ -thalassaemia. In this paper,  
24  
25 we present the protocol for a randomised double-blind placebo-controlled clinical trial  
26  
27 to evaluate the efficacy and safety of oral hydroxyurea in transfusion dependent  $\beta$ -  
28  
29 thalassaemia.  
30  
31  
32  
33  
34  
35  
36  
37  
38  
39  
40  
41  
42  
43  
44  
45  
46  
47  
48  
49  
50  
51  
52  
53  
54  
55  
56  
57  
58  
59  
60

## METHODS AND ANALYSIS

### Study design and setting

This study is an ongoing single-centre, randomised, double-blind, placebo-controlled clinical trial to evaluate the efficacy and safety of oral hydroxyurea for transfusion dependent  $\beta$ -thalassaemia. The study is conducted at the Adult and Adolescent Thalassaemia Centre of Colombo North Teaching Hospital, Ragama, Sri Lanka.

### Study hypothesis

Oral hydroxyurea is an effective, tolerable and safe treatment that upregulates HbF production, improves pre-transfusion haemoglobin level and decreases transfusion requirement in patients with transfusion dependent  $\beta$ -thalassaemia.

### Study population and eligibility criteria

Patients with haematologically and genetically confirmed transfusion dependent  $\beta$ -thalassaemia attending Adult and Adolescent Thalassaemia Centre of Colombo North Teaching Hospital, Ragama, Sri Lanka will be the study population of this clinical trial.

#### ***Inclusion criteria:***

- Patients with confirmed genotypes of homozygous / compound heterozygous  $\beta$ -thalassaemia major or HbE  $\beta$ -thalassaemia
- Patients who are aged over 12 years
- Patients who required more than eight blood transfusions during the preceding 12 months



**Exclusion criteria:**

- Sickle  $\beta$ -thalassaemia
- Co-existing chronic liver disease
- Co-existing chronic kidney disease
- Co-existing viral hepatitis
- Patients with contraindications for hydroxyurea (e.g., hypersensitivity, bone marrow depression, pregnancy and lactation)
- Patients who are expecting to get pregnant during the next 12 months
- Patients who have undergone bone marrow transplantation
- Patients on immunosuppressant therapy
- Baseline serum ferritin  $>5000\text{ng/mL}$
- Baseline white cell count  $<4000/\mu\text{L}$
- Baseline platelet count  $<150,000/\mu\text{L}$
- Patients who were started on regular transfusions for a pre-determined limited period

**Sample size**

The sample size was calculated based on an anticipated response rate of 26% in the hydroxyurea treatment group reported in previous observational studies, a type I error of 0.05 and a power of 80%<sup>19</sup>. The calculated minimum sample size is 50 with 25 patients each in the intervention and control groups. Considering a 10% dropout rate, we aim to recruit 56 patients for the study.

### **Subject enrolment, randomisation and blinding**

All eligible patients who fulfil inclusion criteria will be given a patient information sheet to read and time to clarify doubts with investigators before consenting. Informed written consent from all participants will be obtained before recruiting into the study (Figure 1). When the patient is below the age of 18 years, consent will be obtained from one of the parents, and assent will be obtained from the patient. At the time of enrolment, information on socio-demographic background, family history, past medical history and present medical problems will be gathered using an interviewer-administered questionnaire. Height and weight will be recorded, and abdominal examination will be done to assess hepatic and splenic sizes.

Then patients will be randomised into intervention or placebo group using a stratified block randomisation method. The intervention group will receive hydroxyurea while the control group will receive a placebo. Each patient will be given a trial number for identification. Hydroxyurea or placebo capsules are packed in sealed envelopes which are labelled with the trial number of each patient at a third-party location, and handed over to the investigators. Participants, data collectors, outcome adjudicators and data analysts will be blinded regarding the treatment until the final analysis of data is available.

### **Intervention**

Patients in the intervention group will receive oral hydroxyurea (manufactured by Cadila Healthcare Ltd, India) 10-20mg/kg daily for six months. Patients who weigh less than 50kg receive one 500mg capsule of hydroxyurea while those who weigh over 50kg will receive two 500mg capsules. Patients in the control group will receive the

1  
2  
3 same number of capsules per body weight of a placebo which is identical in size,  
4 shape and colour to hydroxyurea. Placebo capsules (manufactured by State  
5 Pharmaceutical Manufacturing Cooperation, Sri Lanka) contain ingredients identical  
6 to hydroxyurea except for its active ingredient. All other standard treatments that  
7 include blood transfusions and iron chelation will be continued. Patients will receive  
8 leuco-depleted packed red blood cell transfusions when haemoglobin drops below  
9 9g/dL as per unit protocol which is in line with the International Thalassaemia  
10 Federation Guidelines<sup>4</sup>.  
11  
12  
13  
14  
15  
16  
17  
18  
19  
20  
21  
22  
23

## 24 **Study procedure**

### 25 ***Clinical evaluation***

26 All patients will be reviewed at least monthly during the 6-month intervention period  
27 and followed-up for a further six months after discontinuation of treatment. During each  
28 review visit, a trained doctor will complete an interviewer-administered questionnaire  
29 to assess symptoms of anaemia, known and unknown adverse effects of hydroxyurea  
30 and tolerability of hydroxyurea. A complete physical examination will be done to  
31 assess weight, height, adverse effects of hydroxyurea and hepatic and splenic sizes.  
32 The exact volume of transfused blood during each visit will be recorded.  
33  
34  
35  
36  
37  
38  
39  
40  
41  
42  
43  
44  
45  
46  
47

### 48 ***Laboratory evaluation***

49 Full blood count, haemoglobin sub-type quantification,  $\alpha$ - and  $\beta$ -globin genotyping and  
50 *Xmn1* and *BCL11A* polymorphism status will be performed at enrolment to determine  
51 the molecular characteristics of the study population. Additionally, baseline serum  
52 ferritin, creatinine, aspartate aminotransferase (AST) and alanine aminotransferase  
53 (ALT) levels will be measured at enrolment. During each follow-up visit, full blood count  
54  
55  
56  
57  
58  
59  
60

1  
2  
3 and quantification of HbF will be performed. Serum ferritin, creatinine, AST and ALT  
4 will subsequently be checked at 3-monthly intervals. Soluble transferrin receptor levels  
5 will be assessed at the time of enrolment and at the completion of the intervention  
6 period.  
7  
8  
9  
10

11  
12  
13  
14 Full blood counts will be performed using Coulter Ac•T 5diff CP haematology  
15 analyser® whereas, quantification of haemoglobin sub-types and variants will be done  
16 by capillary electrophoresis using Capillarys 2 Flex Piercing® (Sebia) instrument.  
17 Serum ferritin, creatinine, AST and ALT will be measured in a clinically accredited  
18 laboratory using standard protocols. Soluble transferrin receptor levels will be  
19 measured by enzyme linked immunosorbent assay (ELIZA) using monoclonal  
20 antibodies and a commercially available ELIZA kit (R & D technologies). DNA will be  
21 extracted from the cell pellet using QIAGEN DNA mini kit for  $\alpha$ - and  $\beta$ -globin genotype  
22 assays. Amplification-refractory mutation system (ARMS) polymerase chain reaction  
23 (PCR) method will be used to detect known  $\beta$ -thalassaemia mutations by manipulating  
24 the primer sequence at the 3' end. Gap-PCR method will be used to detect two  
25 common deletional mutations ( $\alpha$ -<sup>3.7</sup> and  $\alpha$ -<sup>4.2</sup>) of the  $\alpha$ -globin gene and the presence of  
26 excess  $\alpha$ -globin genes using previously published protocols<sup>21</sup>. *Xmn1* and *BCL11A*  
27 polymorphisms will be identified by restriction fragment length polymorphism method  
28 as per published protocols<sup>22 23</sup>.  
29  
30  
31  
32  
33  
34  
35  
36  
37  
38  
39  
40  
41  
42  
43  
44  
45  
46  
47  
48  
49  
50

### 51 **Compliance evaluation**

52 At each review visit, the number of capsules actually taken by patients will be recorded  
53 during the 6-month intervention period. Treatment compliance will be assessed by  
54  
55  
56  
57  
58  
59  
60

1  
2  
3 dividing the actual number of tablets taken by the estimated number of tablets to be  
4  
5 taken.  
6  
7  
8  
9

### 10 ***Safety evaluation***

11  
12 At follow-up visits during the intervention and 6-month post-intervention periods,  
13  
14 patients will be interviewed by a trained doctor to monitor for known and unknown  
15  
16 adverse effects of hydroxyurea treatment. Known adverse effects of hydroxyurea  
17  
18 include; eczema, skin depigmentation, infection, fever, headache, nausea, vomiting,  
19  
20 constipation, gastric discomfort, leg ulcers, mucositis, weight gain, asthma,  
21  
22 neutropenia and thrombocytopenia. Both haematological and clinical toxicity will be  
23  
24 monitored so that patients could be discontinued from the study if toxicity develops.  
25  
26 All study participants will be given contact details of investigators if they wish to clarify  
27  
28 any doubts regarding the trial, and to report suspected adverse effects at any point of  
29  
30 the trial.  
31  
32  
33  
34  
35  
36  
37  
38  
39  
40  
41  
42  
43  
44  
45  
46  
47  
48  
49  
50

### 37 ***Outcome measures***

#### 40 ***Primary outcome***

41  
42 Cessation or reduction of blood transfusion requirement during the treatment period  
43  
44 will be the primary outcome measure.  
45  
46  
47  
48  
49  
50

#### 49 ***Secondary outcomes***

- 51 1. A rise in fetal haemoglobin percentage
- 52  
53 2. Reduction in ineffective erythropoiesis as measured by elevated soluble  
54  
55 transferrin receptor levels
- 56  
57  
58 3. Compliance to treatment  
59  
60

#### 4. Safety and adverse effects of treatment

##### **Exploratory outcomes**

1. Effect of *Xmn1* polymorphism on response to treatment
2. Effect of *BCL11A* polymorphism on response to treatment

##### **Statistical analysis**

Data will be analysed using univariate and multivariate analysis by IBM SPSS statistics version 25. The analysis will be based on intention to treat, and dropouts and discontinued patients will be included in the analysis.

##### **Data management and monitoring**

All completed anonymised questionnaires and laboratory reports will be stored in locked cupboards with participant serial numbers written on individual files. Only the investigators will have access to hard copies. The electronic database will be maintained as a password-protected file. Material obtained from blood samples will be safely destroyed after completion of the study. A three-member independent data monitoring committee comprised of a paediatrician, a haematologist and a biostatistician has been appointed to make appropriate recommendations on participant safety and trial integrity.

##### **Ethical considerations**

Investigators will not be involved in making management decisions (other than hydroxyurea treatment) which will be done by the clinical team caring for subjects. All decisions regarding blood transfusions will be taken by the clinical management team

1  
2  
3 according to unit protocols. Patients who develop severe adverse events  
4 (haematological or clinical) related or unrelated to the treatment during the study  
5 period and those who are unable to tolerate hydroxyurea will be discontinued from the  
6 study. Suspected adverse events will be reported according to the national guidelines.  
7  
8 Participants will have the right to withdraw from the trial at any point without providing  
9 explanations.  
10  
11  
12  
13  
14  
15  
16  
17  
18

19 Ethical approval for the study has been obtained from the Ethics Committee of the  
20 Faculty of Medicine, University of Kelaniya, Sri Lanka (Ref. P/116/05/2018). The trial  
21 is registered at the Sri Lanka Clinical Trials Registry (Ref: SLCTR/2018/024) and is  
22 approved by the National Medicinal Regulatory Authority of Sri Lanka.  
23  
24  
25  
26  
27  
28  
29

### 30 **Termination of the trial**

31 The trial will be terminated if;

- 32 • New information regarding the safety or efficacy of hydroxyurea that indicates a  
33 change in the known risk/benefit profile becomes available, such that the  
34 risk/benefit is no longer acceptable for subjects participating in the trial
  - 35 • Significant violation of good clinical practise that compromises the ability to  
36 achieve study objectives or compromises subject safety
- 37  
38  
39  
40  
41  
42  
43  
44  
45  
46  
47  
48

### 49 **Study status**

50 The trial commenced in August 2019 according to the protocol of version 2.0, 28 May  
51 2018 and is currently open for recruitment. We have recruited 18 patients for the trial  
52 so far.  
53  
54  
55  
56  
57  
58  
59  
60

### **Patient and public involvement**

The research question related to this clinical trial was based on the positive feedback from patients with non-transfusion dependent  $\beta$ -thalassaemia who are already taking oral hydroxyurea. Reports of the investigations done as part of the trial will be available to all participants and used in the standard management when required. The results of the study will be disseminated to study participants and all patients with  $\beta$ -thalassaemia in Sri Lanka using patient education lectures after completion of the trial.



## DISCUSSION

Despite being one of the first genetic diseases to be characterised precisely at the molecular level,  $\beta$ -thalassaemia remains a life-limiting disorder without an effective cure<sup>24</sup>. Nonetheless, several attempts exploring novel pathways are currently underway to develop a cure for  $\beta$ -thalassaemia. Most of these emerging therapies use advanced experimental technologies like gene therapy or genome editing<sup>25-28</sup>, hence may not be available to a majority of patients living in low- and middle-income countries<sup>29</sup>.

In this clinical trial, we aim to determine the efficacy and safety of oral hydroxyurea in minimising transfusion requirements and improving clinical outcomes of patients with transfusion dependent  $\beta$ -thalassaemia. Hydroxyurea is an already FDA approved drug which is currently being used for other indications including sickle cell disease and non-transfusion dependent  $\beta$ -thalassaemia<sup>30</sup>. However, its efficacy in patients with transfusion-dependent  $\beta$ -thalassemia is inconclusive. Our trial is designed to address this knowledge gap regarding treatment of  $\beta$ -thalassaemia. All previous studies which aim to evaluate the efficacy of hydroxyurea for transfusion dependent  $\beta$ -thalassaemia are either observational studies or trials without control arms<sup>19 31-34</sup>. Our study is probably the first randomised double-blind placebo-controlled clinical trial to evaluate the efficacy of hydroxyurea in transfusion dependent  $\beta$ -thalassaemia.

Previous use of hydroxyurea has suggested a starting dose of 10-15mg/kg/day and dose increments by 5mg/kg/day until a maximum tolerable dose of 35mg/kg/day is reached<sup>35 36</sup>. Because hydroxyurea is available as 500mg capsules, we utilised a fixed-dose range of 10-20mg/kg/day for this study. After oral administration,

1  
2  
3 hydroxyurea is rapidly absorbed by the gastrointestinal tract, and a peak plasma  
4 concentration is detected after 1-4 hours. Disproportionately high peak plasma  
5 concentration is associated with increasing dose; hence, once-daily dosing of  
6 hydroxyurea is recommended<sup>36</sup>.  
7  
8  
9  
10  
11

12  
13  
14 The effects of hydroxyurea in  $\beta$ -thalassaemia could be multiple. Therefore, in the  
15 current study, we aim to evaluate the effects of hydroxyurea on transfusion  
16 requirement, pre-transfusion haemoglobin, HbF levels and ineffective erythropoiesis.  
17 Additionally, we will evaluate several factors, for example  $\alpha$ - and  $\beta$ -globin genotypes  
18 and genetic polymorphisms in the *Xmn1* and *BCL11A* genomic loci, which may be  
19 important in determining the response to hydroxyurea. This is particularly relevant as  
20 polymorphisms in *BCL11A* and *Xmn1* have been suggested to predict the response  
21 to hydroxyurea in non-transfusion dependent  $\beta$ -thalassaemia patients<sup>37 38</sup>. Therefore,  
22 through these approaches, we will be able to provide important mechanistic data on  
23 the action of hydroxyurea which is still incomplete.  
24  
25  
26  
27  
28  
29  
30  
31  
32  
33  
34  
35  
36  
37  
38  
39

#### 40 **Limitations**

41  
42 One important limitation of this trial is that these patients are on regular transfusion  
43 regimens. It was deemed unethical to stop transfusions in these patients for us to  
44 evaluate the full efficacy of hydroxyurea to see whether these patients could maintain  
45 a steady-state, safe albeit lower haemoglobin level of approximately 7-8g/dL without  
46 transfusions. All patients in the trial will continue to receive standard treatment with  
47 transfusions when their haemoglobin drops below 9g/dL. Therefore, we will only be  
48 able to evaluate the reduction in transfusion requirement as an outcome measure.  
49 Similarly, we may not be able to evaluate the effects on HbF fully. However, this is  
50  
51  
52  
53  
54  
55  
56  
57  
58  
59  
60

1  
2  
3 acceptable as most previous clinical trials on transfusion-dependent  $\beta$ -thalassaemia  
4  
5 have demonstrated reduction in transfusion burden rather than complete cessation of  
6  
7 transfusions<sup>39</sup>.  
8  
9

## 10 11 12 **FIGURE LEGENDS** 13

14 Figure 1 – Study design and participant flow through the study  
15  
16  
17  
18  
19  
20  
21  
22  
23  
24  
25  
26  
27  
28  
29  
30  
31  
32  
33  
34  
35  
36  
37  
38  
39  
40  
41  
42  
43  
44  
45  
46  
47  
48  
49  
50  
51  
52  
53  
54  
55  
56  
57  
58  
59  
60

For peer review only

## REFERENCES

1. Taher AT, Weatherall DJ, Cappellini MD. Thalassaemia. *Lancet* 2018;391(10116):155-67. doi: 10.1016/S0140-6736(17)31822-6 [published Online First: 2017/08/05]
2. Weatherall DJ. The inherited diseases of hemoglobin are an emerging global health burden. *Blood* 2010;115(22):4331-6. doi: 10.1182/blood-2010-01-251348 [published Online First: 2010/03/18]
3. Mettananda S. Management of Thalassaemia. *Sri Lanka Journal of Child Health* 2018;47(2):159-65.
4. Cappellini MD, Cohen A, Porter J, et al. Guidelines for the management of transfusion dependent thalassaemia (TDT) 3rd Edition ed. Cyprus: Thalassaemia International Federation 2014.
5. Mettananda S, Pathiraja H, Peiris R, et al. Blood transfusion therapy for beta-thalassaemia major and hemoglobin E beta-thalassaemia: Adequacy, trends, and determinants in Sri Lanka. *Pediatric blood & cancer* 2019;66(5):e27643. doi: 10.1002/pbc.27643 [published Online First: 2019/01/31]
6. Suriapperuma T, Peiris R, Mettananda C, et al. Body iron status of children and adolescents with transfusion dependent beta-thalassaemia: trends of serum ferritin and associations of optimal body iron control. *BMC Res Notes* 2018;11(1):547. doi: 10.1186/s13104-018-3634-9 [published Online First: 2018/08/04]
7. Mettananda S, Peiris R, Pathiraja H, et al. Psychological morbidity among children with transfusion dependent beta-thalassaemia and their parents in Sri Lanka. *PloS one* 2020;15(2):e0228733. doi: 10.1371/journal.pone.0228733 [published Online First: 2020/02/12]
8. Mettananda S, Pathiraja H, Peiris R, et al. Health related quality of life among children with transfusion dependent beta-thalassaemia major and haemoglobin E beta-thalassaemia in Sri Lanka: a case control study. *Health Qual Life Outcomes* 2019;17(1):137. doi: 10.1186/s12955-019-1207-9 [published Online First: 2019/08/10]
9. Mettananda S, Gibbons RJ, Higgs DR. Understanding alpha-globin gene regulation and implications for the treatment of beta-thalassaemia. *Annals of the New York Academy of Sciences* 2016;1368(1):16-24. doi: 10.1111/nyas.12988 [published Online First: 2015/12/24]
10. Mettananda S, Higgs DR. Molecular Basis and Genetic Modifiers of Thalassaemia. *Hematology/oncology clinics of North America* 2018;32(2):177-91. doi: 10.1016/j.hoc.2017.11.003 [published Online First: 2018/02/21]
11. Mettananda S, Gibbons RJ, Higgs DR. alpha-Globin as a molecular target in the treatment of beta-thalassaemia. *Blood* 2015;125(24):3694-701. doi: 10.1182/blood-2015-03-633594 [published Online First: 2015/04/15]
12. Bauer DE, Kamran SC, Orkin SH. Reawakening fetal hemoglobin: prospects for new therapies for the beta-globin disorders. *Blood* 2012;120(15):2945-53. doi: 10.1182/blood-2012-06-292078 [published Online First: 2012/08/21]

- 1  
2  
3 13. Kosaryan M, Karami H, Zafari M, et al. Report on Patients with Non Transfusion-  
4 Dependent  $\beta$ -Thalassemia Major Being Treated with Hydroxyurea Attending the  
5 Thalassemia Research Center, Sari, Mazandaran Province, Islamic Republic of  
6 Iran in 2013. *Hemoglobin* 2014;38(2):115-18. doi:  
7 10.3109/03630269.2013.869229  
8
- 9  
10 14. Fucharoen S, Siritanaratkul N, Winichagoon P, et al. Hydroxyurea increases  
11 hemoglobin F levels and improves the effectiveness of erythropoiesis in beta-  
12 thalassemia/hemoglobin E disease. *Blood* 1996;87(3):887-92. [published Online  
13 First: 1996/02/01]  
14
- 15 15. Letvin NL, Linch DC, Beardsley GP, et al. Augmentation of fetal-hemoglobin  
16 production in anemic monkeys by hydroxyurea. *The New England journal of*  
17 *medicine* 1984;310(14):869-73. doi: 10.1056/NEJM198404053101401 [published  
18 Online First: 1984/04/05]  
19
- 20 16. Algirairi AH, Kassam A. Hydroxyurea for hemoglobin E/beta-thalassemia: a  
21 systematic review and meta-analysis. *International journal of hematology*  
22 2017;106(6):748-56. doi: 10.1007/s12185-017-2307-0 [published Online First:  
23 2017/08/09]  
24
- 25 17. Foong WC, Ho JJ, Loh CK, et al. Hydroxyurea for reducing blood transfusion in  
26 non-transfusion dependent beta thalassaemias. *The Cochrane database of*  
27 *systematic reviews* 2016;10:CD011579. doi: 10.1002/14651858.CD011579.pub2  
28 [published Online First: 2016/11/02]  
29
- 30 18. Nevitt SJ, Jones AP, Howard J. Hydroxyurea (hydroxycarbamide) for sickle cell  
31 disease. *The Cochrane database of systematic reviews* 2017;4(4):Cd002202. doi:  
32 10.1002/14651858.CD002202.pub2 [published Online First: 2017/04/21]  
33
- 34 19. Algirairi AH, Wright NAM, Paolucci EO, et al. Hydroxyurea for lifelong transfusion-  
35 dependent beta-thalassemia: A meta-analysis. *Pediatric hematology and*  
36 *oncology* 2017;34(8):435-48. doi: 10.1080/08880018.2017.1354948 [published  
37 Online First: 2018/01/18]  
38
- 39 20. Ansari SH, Lassi ZS, Khowaja SM, et al. Hydroxyurea (hydroxycarbamide) for  
40 transfusion-dependent  $\beta$ -thalassaemia. *The Cochrane database of systematic*  
41 *reviews* 2019;3(3):Cd012064. doi: 10.1002/14651858.CD012064.pub2 [published  
42 Online First: 2019/03/19]  
43
- 44 21. Premawardhena A, Allen A, Piel F, et al. The evolutionary and clinical implications  
45 of the uneven distribution of the frequency of the inherited haemoglobin variants  
46 over short geographical distances. *Br J Haematol* 2017;176(3):475-84. doi:  
47 10.1111/bjh.14437  
48
- 49 22. Perera S, Allen A, Silva I, et al. Genotype-phenotype association analysis identifies  
50 the role of  $\alpha$  globin genes in modulating disease severity of  $\beta$  thalassaemia  
51 intermedia in Sri Lanka. *Scientific Reports* 2019;9(1):10116. doi: 10.1038/s41598-  
52 019-46674-y  
53
- 54 23. Peri KG, Gagnon J, Gagnon C, et al. Association of -158(C  $\rightarrow$  T) (Xmnl) DNA  
55 Polymorphism in  $\gamma$ -Globin Promoter with Delayed Switchover from Fetal to Adult  
56 Hemoglobin Synthesis. *Pediatric research* 1997;41(2):214-17. doi:  
57 10.1203/00006450-199702000-00010  
58  
59  
60

- 1  
2  
3 24. Cappellini MD, Porter JB, Viprakasit V, et al. A paradigm shift on beta-  
4 thalassaemia treatment: How will we manage this old disease with new therapies?  
5 *Blood reviews* 2018;32(4):300-11. doi: 10.1016/j.blre.2018.02.001 [published  
6 Online First: 2018/02/20]  
7
- 8 25. Thompson AA, Walters MC, Kwiatkowski J, et al. Gene Therapy in Patients with  
9 Transfusion-Dependent beta-Thalassemia. *The New England journal of medicine*  
10 2018;378(16):1479-93. doi: 10.1056/NEJMoa1705342 [published Online First:  
11 2018/04/19]  
12
- 13 26. Mettananda S, Yasara N, Fisher CA, et al. Synergistic silencing of alpha-globin  
14 and induction of gamma-globin by histone deacetylase inhibitor, vorinostat as a  
15 potential therapy for beta-thalassaemia. *Sci Rep* 2019;9(1):11649. doi:  
16 10.1038/s41598-019-48204-2 [published Online First: 2019/08/14]  
17
- 18 27. Mettananda S, Fisher CA, Hay D, et al. Editing an alpha-globin enhancer in primary  
19 human hematopoietic stem cells as a treatment for beta-thalassemia. *Nature*  
20 *communications* 2017;8(1):424. doi: 10.1038/s41467-017-00479-7 [published  
21 Online First: 2017/09/06]  
22
- 23 28. Mettananda S, Fisher CA, Sloane-Stanley JA, et al. Selective silencing of alpha-  
24 globin by the histone demethylase inhibitor IOX1: a potentially new pathway for  
25 treatment of beta-thalassemia. *Haematologica* 2017;102(3):e80-e84. doi:  
26 10.3324/haematol.2016.155655 [published Online First: 2016/11/05]  
27
- 28 29. Mettananda S. Thalassaemia: In a quest towards an ultimate cure. *Sri Lanka*  
29 *Journal of Child Health* 2017;46(3):203-10.  
30
- 31 30. Algiraigri AH, Wright NAM, Paolucci EO, et al. Hydroxyurea for nontransfusion-  
32 dependent beta-thalassemia: A systematic review and meta-analysis. *Hematol*  
33 *Oncol Stem Cell Ther* 2017;10(3):116-25. doi: 10.1016/j.hemonc.2017.02.002  
34 [published Online First: 2017/04/15]  
35
- 36 31. Bradai M, Abad MT, Pissard S, et al. Hydroxyurea can eliminate transfusion  
37 requirements in children with severe beta-thalassemia. *Blood* 2003;102(4):1529-  
38 30. doi: 10.1182/blood-2003-01-0117 [published Online First: 2003/04/19]  
39
- 40 32. Ansari SH, Shamsi TS, Munzir S, et al. Gγ-Xmn I polymorphism: a significant  
41 determinant of β-thalassemia treatment without blood transfusion. *Journal of*  
42 *pediatric hematology/oncology* 2013;35(4):e153-6. doi:  
43 10.1097/MPH.0b013e31827e8662 [published Online First: 2013/02/08]  
44
- 45 33. Ansari SH, Shamsi TS, Ashraf M, et al. Efficacy of hydroxyurea in providing  
46 transfusion independence in β-thalassemia. *Journal of pediatric*  
47 *hematology/oncology* 2011;33(5):339-43. doi: 10.1097/MPH.0b013e31821b0770  
48 [published Online First: 2011/05/24]  
49
- 50 34. Karimi M, Haghpanah S, Farhadi A, et al. Genotype-phenotype relationship of  
51 patients with β-thalassemia taking hydroxyurea: a 13-year experience in Iran.  
52 *International journal of hematology* 2012;95(1):51-6. doi: 10.1007/s12185-011-  
53 0985-6 [published Online First: 2011/12/20]  
54
- 55 35. Estep JH, Smeltzer MP, Kang G, et al. A clinically meaningful fetal hemoglobin  
56 threshold for children with sickle cell anemia during hydroxyurea therapy.  
57 *American journal of hematology* 2017;92(12):1333-39. doi: 10.1002/ajh.24906  
58 [published Online First: 2017/09/16]  
59  
60

- 1  
2  
3 36. Agrawal RK, Patel RK, shah V, et al. Hydroxyurea in Sickle Cell Disease: Drug  
4 Review. *Indian Journal of Hematology and Blood Transfusion* 2014;30(2):91-96.  
5 doi: 10.1007/s12288-013-0261-4  
6  
7 37. Banan M. Hydroxyurea treatment in  $\beta$ -thalassemia patients: to respond or not to  
8 respond? *Annals of hematology* 2013;92(3):289-99. doi: 10.1007/s00277-012-  
9 1671-3  
10  
11 38. Pule GD, Mowla S, Novitzky N, et al. Hydroxyurea down-regulates BCL11A, KLF-1  
12 and MYB through miRNA-mediated actions to induce  $\gamma$ -globin expression:  
13 implications for new therapeutic approaches of sickle cell disease. *Clinical and*  
14 *Translational Medicine* 2016;5(1):15. doi: 10.1186/s40169-016-0092-7  
15  
16 39. Cappellini MD, Viprakasit V, Taher AT, et al. A Phase 3 Trial of Luspatercept in  
17 Patients with Transfusion-Dependent  $\beta$ -Thalassemia. *New Engl J Med*  
18 2020;382(13):1219-31. doi: 10.1056/NEJMoa1910182  
19  
20  
21  
22  
23  
24  
25  
26  
27  
28  
29  
30  
31  
32  
33  
34  
35  
36  
37  
38  
39  
40  
41  
42  
43  
44  
45  
46  
47  
48  
49  
50  
51  
52  
53  
54  
55  
56  
57  
58  
59  
60

1  
2  
3 **Author contributions:** AP and SM conceived the study. NY, NW, CM, AM, AP and  
4 SM contributed to the study design. NY drafted the manuscript and CM and SM  
5  
6 finalised the manuscript. All authors assisted in developing the protocol and have read,  
7  
8 reviewed, edited and approved the final manuscript.  
9  
10  
11  
12  
13

14 **Funding statement:** This work was supported by the National Research Council of  
15 Sri Lanka Investigator Driven Research Grant (Number 18-030) to SM. Funding  
16  
17 agency does not have any role in the study design, data collection, data analysis or  
18  
19 publication of results.  
20  
21  
22  
23  
24  
25

26 **Competing interests statement:** None declared.  
27  
28  
29  
30  
31  
32  
33  
34  
35  
36  
37  
38  
39  
40  
41  
42  
43  
44  
45  
46  
47  
48  
49  
50  
51  
52  
53  
54  
55  
56  
57  
58  
59  
60



1  
2  
3  
4  
5  
6  
7  
8  
9  
10  
11  
12  
13  
14  
15  
16  
17  
18  
19  
20  
21  
22  
23  
24  
25  
26  
27  
28  
29  
30  
31  
32  
33  
34  
35  
36  
37  
38  
39  
40  
41  
42  
43  
44  
45  
46  
47  
48  
49  
50  
51  
52  
53  
54  
55  
56  
57  
58  
59  
60



## **Research protocol checklist**

**Manuscript title:** Efficacy and safety of oral hydroxyurea for transfusion dependent  $\beta$ -thalassaemia: a protocol for randomised double-blind controlled clinical trial

SPIRIT 2013 Checklist: Recommended items to address in a clinical trial protocol and related documents\*

| <b>Section/item</b>               | <b>Item No</b> | <b>Description</b>                                                                                                                                                                                                                                                                       | <b>Page number/s</b> |
|-----------------------------------|----------------|------------------------------------------------------------------------------------------------------------------------------------------------------------------------------------------------------------------------------------------------------------------------------------------|----------------------|
| <b>Administrative information</b> |                |                                                                                                                                                                                                                                                                                          |                      |
| Title                             | 1              | Descriptive title identifying the study design, population, interventions, and, if applicable, trial acronym                                                                                                                                                                             | 1                    |
| Trial registration                | 2a             | Trial identifier and registry name. If not yet registered, name of intended registry                                                                                                                                                                                                     | 3                    |
|                                   | 2b             | All items from the World Health Organization Trial Registration Data Set                                                                                                                                                                                                                 | 3, 14                |
| Protocol version                  | 3              | Date and version identifier                                                                                                                                                                                                                                                              | 14                   |
| Funding                           | 4              | Sources and types of financial, material, and other support                                                                                                                                                                                                                              | 23                   |
| Roles and responsibilities        | 5a             | Names, affiliations, and roles of protocol contributors                                                                                                                                                                                                                                  | 1                    |
|                                   | 5b             | Name and contact information for the trial sponsor                                                                                                                                                                                                                                       | 23                   |
|                                   | 5c             | Role of study sponsor and funders, if any, in study design; collection, management, analysis, and interpretation of data; writing of the report; and the decision to submit the report for publication, including whether they will have ultimate authority over any of these activities | 23                   |
|                                   | 5d             | Composition, roles, and responsibilities of the coordinating centre, steering committee, endpoint adjudication committee, data management team, and other individuals or groups overseeing the trial, if applicable (see Item 21a for data monitoring committee)                         | 13                   |
| <b>Introduction</b>               |                |                                                                                                                                                                                                                                                                                          |                      |

|                                                                                        |                                                           |     |                                                                                                                                                                                                                                                                                                                                                                                |       |
|----------------------------------------------------------------------------------------|-----------------------------------------------------------|-----|--------------------------------------------------------------------------------------------------------------------------------------------------------------------------------------------------------------------------------------------------------------------------------------------------------------------------------------------------------------------------------|-------|
| 1<br>2<br>3<br>4<br>5<br>6<br>7                                                        | Background and rationale                                  | 6a  | Description of research question and justification for undertaking the trial, including summary of relevant studies (published and unpublished) examining benefits and harms for each intervention                                                                                                                                                                             | 5,6   |
| 8<br>9                                                                                 |                                                           | 6b  | Explanation for choice of comparators                                                                                                                                                                                                                                                                                                                                          | 5,6   |
| 10<br>11                                                                               | Objectives                                                | 7   | Specific objectives or hypotheses                                                                                                                                                                                                                                                                                                                                              | 7     |
| 12<br>13<br>14<br>15<br>16                                                             | Trial design                                              | 8   | Description of trial design including type of trial (eg, parallel group, crossover, factorial, single group), allocation ratio, and framework (eg, superiority, equivalence, noninferiority, exploratory)                                                                                                                                                                      | 7     |
| 17                                                                                     | <b>Methods: Participants, interventions, and outcomes</b> |     |                                                                                                                                                                                                                                                                                                                                                                                |       |
| 18<br>19<br>20<br>21<br>22<br>23<br>24                                                 | Study setting                                             | 9   | Description of study settings (eg, community clinic, academic hospital) and list of countries where data will be collected. Reference to where list of study sites can be obtained                                                                                                                                                                                             | 7     |
| 25<br>26<br>27<br>28<br>29<br>30                                                       | Eligibility criteria                                      | 10  | Inclusion and exclusion criteria for participants. If applicable, eligibility criteria for study centres and individuals who will perform the interventions (eg, surgeons, psychotherapists)                                                                                                                                                                                   | 7,8   |
| 31<br>32<br>33<br>34<br>35<br>36<br>37<br>38<br>39<br>40<br>41<br>42<br>43<br>44<br>45 | Interventions                                             | 11a | Interventions for each group with sufficient detail to allow replication, including how and when they will be administered                                                                                                                                                                                                                                                     | 9-11  |
| 46<br>47<br>48                                                                         |                                                           | 11b | Criteria for discontinuing or modifying allocated interventions for a given trial participant (eg, drug dose change in response to harms, participant request, or improving/worsening disease)                                                                                                                                                                                 | 11-12 |
| 49<br>50<br>51<br>52<br>53<br>54<br>55<br>56<br>57                                     |                                                           | 11c | Strategies to improve adherence to intervention protocols, and any procedures for monitoring adherence (eg, drug tablet return, laboratory tests)                                                                                                                                                                                                                              | 13    |
| 58<br>59<br>60                                                                         |                                                           | 11d | Relevant concomitant care and interventions that are permitted or prohibited during the trial                                                                                                                                                                                                                                                                                  | 10-12 |
|                                                                                        | Outcomes                                                  | 12  | Primary, secondary, and other outcomes, including the specific measurement variable (eg, systolic blood pressure), analysis metric (eg, change from baseline, final value, time to event), method of aggregation (eg, median, proportion), and time point for each outcome. Explanation of the clinical relevance of chosen efficacy and harm outcomes is strongly recommended | 12,13 |

|                                                                     |     |                                                                                                                                                                                                                                                                                                                                                          |                |
|---------------------------------------------------------------------|-----|----------------------------------------------------------------------------------------------------------------------------------------------------------------------------------------------------------------------------------------------------------------------------------------------------------------------------------------------------------|----------------|
| Participant timeline                                                | 13  | Time schedule of enrolment, interventions (including any run-ins and washouts), assessments, and visits for participants. A schematic diagram is highly recommended (see Figure)                                                                                                                                                                         | 9-13, Figure 1 |
| Sample size                                                         | 14  | Estimated number of participants needed to achieve study objectives and how it was determined, including clinical and statistical assumptions supporting any sample size calculations                                                                                                                                                                    | 8              |
| Recruitment                                                         | 15  | Strategies for achieving adequate participant enrolment to reach target sample size                                                                                                                                                                                                                                                                      | 8              |
| <b>Methods: Assignment of interventions (for controlled trials)</b> |     |                                                                                                                                                                                                                                                                                                                                                          |                |
| Allocation:                                                         |     |                                                                                                                                                                                                                                                                                                                                                          |                |
| Sequence generation                                                 | 16a | Method of generating the allocation sequence (eg, computer-generated random numbers), and list of any factors for stratification. To reduce predictability of a random sequence, details of any planned restriction (eg, blocking) should be provided in a separate document that is unavailable to those who enrol participants or assign interventions | 9              |
| Allocation concealment mechanism                                    | 16b | Mechanism of implementing the allocation sequence (eg, central telephone; sequentially numbered, opaque, sealed envelopes), describing any steps to conceal the sequence until interventions are assigned                                                                                                                                                | 9              |
| Implementation                                                      | 16c | Who will generate the allocation sequence, who will enrol participants, and who will assign participants to interventions                                                                                                                                                                                                                                | 9              |
| Blinding (masking)                                                  | 17a | Who will be blinded after assignment to interventions (eg, trial participants, care providers, outcome assessors, data analysts), and how                                                                                                                                                                                                                | 9              |
|                                                                     | 17b | If blinded, circumstances under which unblinding is permissible, and procedure for revealing a participant's allocated intervention during the trial                                                                                                                                                                                                     | 9              |
| <b>Methods: Data collection, management, and analysis</b>           |     |                                                                                                                                                                                                                                                                                                                                                          |                |

|                                                          |                            |     |                                                                                                                                                                                                                                                                                                                                                                                                              |       |
|----------------------------------------------------------|----------------------------|-----|--------------------------------------------------------------------------------------------------------------------------------------------------------------------------------------------------------------------------------------------------------------------------------------------------------------------------------------------------------------------------------------------------------------|-------|
| 1<br>2<br>3<br>4<br>5<br>6<br>7<br>8<br>9<br>10<br>11    | Data collection methods    | 18a | Plans for assessment and collection of outcome, baseline, and other trial data, including any related processes to promote data quality (eg, duplicate measurements, training of assessors) and a description of study instruments (eg, questionnaires, laboratory tests) along with their reliability and validity, if known. Reference to where data collection forms can be found, if not in the protocol | 10-12 |
| 12<br>13<br>14<br>15<br>16<br>17                         |                            | 18b | Plans to promote participant retention and complete follow-up, including list of any outcome data to be collected for participants who discontinue or deviate from intervention protocols                                                                                                                                                                                                                    | 10-12 |
| 18<br>19<br>20<br>21<br>22<br>23<br>24                   | Data management            | 19  | Plans for data entry, coding, security, and storage, including any related processes to promote data quality (eg, double data entry; range checks for data values). Reference to where details of data management procedures can be found, if not in the protocol                                                                                                                                            | 13    |
| 25<br>26<br>27<br>28<br>29<br>30                         | Statistical methods        | 20a | Statistical methods for analysing primary and secondary outcomes. Reference to where other details of the statistical analysis plan can be found, if not in the protocol                                                                                                                                                                                                                                     | 13    |
| 31<br>32<br>33                                           |                            | 20b | Methods for any additional analyses (eg, subgroup and adjusted analyses)                                                                                                                                                                                                                                                                                                                                     | 13    |
| 34<br>35<br>36<br>37<br>38<br>39                         |                            | 20c | Definition of analysis population relating to protocol non-adherence (eg, as randomised analysis), and any statistical methods to handle missing data (eg, multiple imputation)                                                                                                                                                                                                                              | 13    |
| 40                                                       | <b>Methods: Monitoring</b> |     |                                                                                                                                                                                                                                                                                                                                                                                                              |       |
| 41<br>42<br>43<br>44<br>45<br>46<br>47<br>48<br>49<br>50 | Data monitoring            | 21a | Composition of data monitoring committee (DMC); summary of its role and reporting structure; statement of whether it is independent from the sponsor and competing interests; and reference to where further details about its charter can be found, if not in the protocol. Alternatively, an explanation of why a DMC is not needed                                                                        | 13    |
| 51<br>52<br>53<br>54<br>55<br>56<br>57<br>58<br>59<br>60 |                            | 21b | Description of any interim analyses and stopping guidelines, including who will have access to these interim results and make the final decision to terminate the trial                                                                                                                                                                                                                                      | 14    |

|                                 |     |                                                                                                                                                                                                                                                                                     |           |
|---------------------------------|-----|-------------------------------------------------------------------------------------------------------------------------------------------------------------------------------------------------------------------------------------------------------------------------------------|-----------|
| Harms                           | 22  | Plans for collecting, assessing, reporting, and managing solicited and spontaneously reported adverse events and other unintended effects of trial interventions or trial conduct                                                                                                   | 12-14     |
| Auditing                        | 23  | Frequency and procedures for auditing trial conduct, if any, and whether the process will be independent from investigators and the sponsor                                                                                                                                         | 13        |
| <b>Ethics and dissemination</b> |     |                                                                                                                                                                                                                                                                                     |           |
| Research ethics approval        | 24  | Plans for seeking research ethics committee/institutional review board (REC/IRB) approval                                                                                                                                                                                           | 13,14     |
| Protocol amendments             | 25  | Plans for communicating important protocol modifications (eg, changes to eligibility criteria, outcomes, analyses) to relevant parties (eg, investigators, REC/IRBs, trial participants, trial registries, journals, regulators)                                                    | 13,14     |
| Consent or assent               | 26a | Who will obtain informed consent or assent from potential trial participants or authorised surrogates, and how (see Item 32)                                                                                                                                                        | 9         |
|                                 | 26b | Additional consent provisions for collection and use of participant data and biological specimens in ancillary studies, if applicable                                                                                                                                               | 9         |
| Confidentiality                 | 27  | How personal information about potential and enrolled participants will be collected, shared, and maintained in order to protect confidentiality before, during, and after the trial                                                                                                | 13        |
| Declaration of interests        | 28  | Financial and other competing interests for principal investigators for the overall trial and each study site                                                                                                                                                                       | 23        |
| Access to data                  | 29  | Statement of who will have access to the final trial dataset, and disclosure of contractual agreements that limit such access for investigators                                                                                                                                     | 13        |
| Ancillary and post-trial care   | 30  | Provisions, if any, for ancillary and post-trial care, and for compensation to those who suffer harm from trial participation                                                                                                                                                       | 11-12     |
| Dissemination policy            | 31a | Plans for investigators and sponsor to communicate trial results to participants, healthcare professionals, the public, and other relevant groups (eg, via publication, reporting in results databases, or other data sharing arrangements), including any publication restrictions | 3, 14, 15 |

|                            |     |                                                                                                                                                                                                |                      |
|----------------------------|-----|------------------------------------------------------------------------------------------------------------------------------------------------------------------------------------------------|----------------------|
|                            | 31b | Authorship eligibility guidelines and any intended use of professional writers                                                                                                                 | 23                   |
|                            | 31c | Plans, if any, for granting public access to the full protocol, participant-level dataset, and statistical code                                                                                | n/a                  |
| <b>Appendices</b>          |     |                                                                                                                                                                                                |                      |
| Informed consent materials | 32  | Model consent form and other related documentation given to participants and authorised surrogates                                                                                             | Available on request |
| Biological specimens       | 33  | Plans for collection, laboratory evaluation, and storage of biological specimens for genetic or molecular analysis in the current trial and for future use in ancillary studies, if applicable | 10-11                |

\*It is strongly recommended that this checklist be read in conjunction with the SPIRIT 2013 Explanation & Elaboration for important clarification on the items. Amendments to the protocol should be tracked and dated. The SPIRIT checklist is copyrighted by the SPIRIT Group under the Creative Commons "[Attribution-NonCommercial-NoDerivs 3.0 Unported](https://creativecommons.org/licenses/by-nc-nd/3.0/)" license.
